# Supplementary material
Source: publisher figshare collection journal article supplement (https://plos.figshare.com/articles/dataset/_/1050853)

Figure S4

A

Genotype Associated CpG Methylation

Heterozygote ASM Probability

rs10491434\_BSP\_CpG\_29

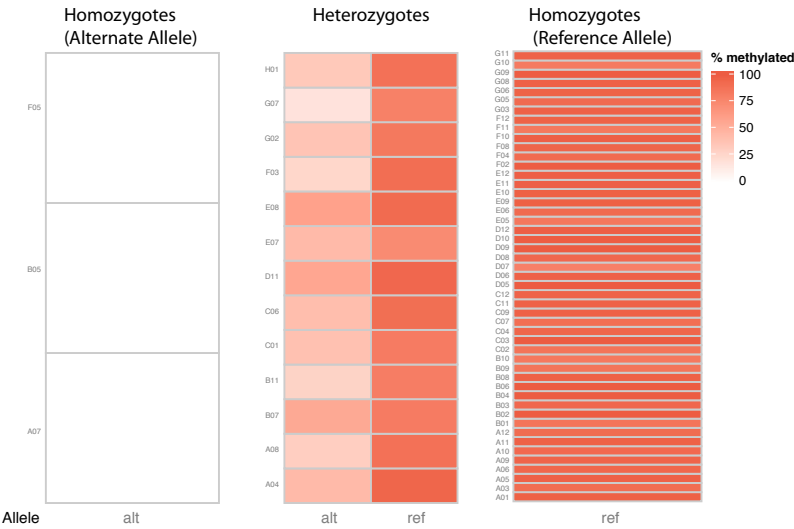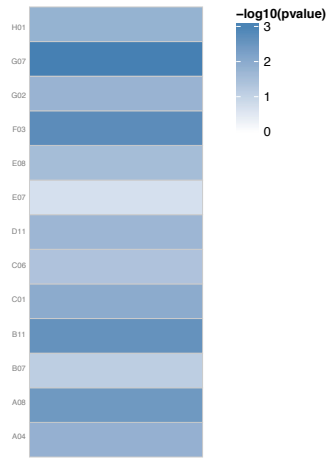

rs10491434\_BSP\_CpG\_38

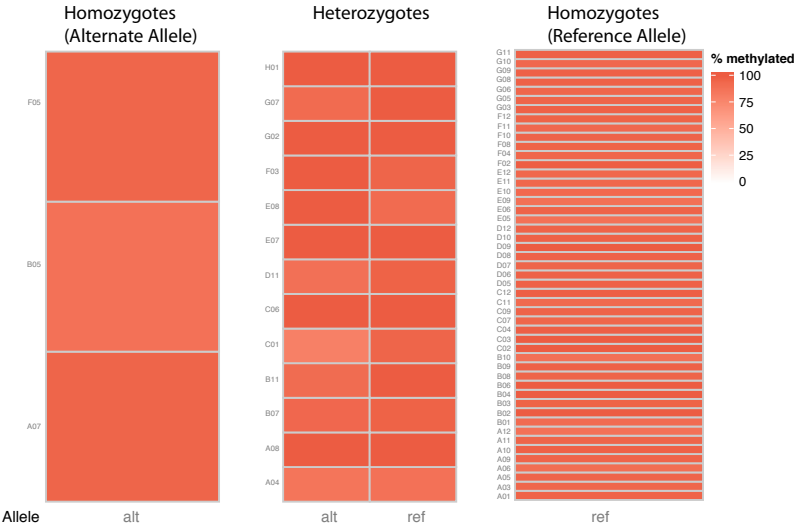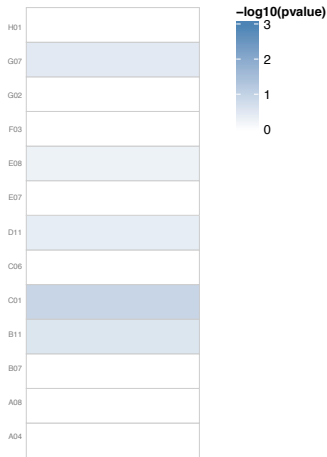



C

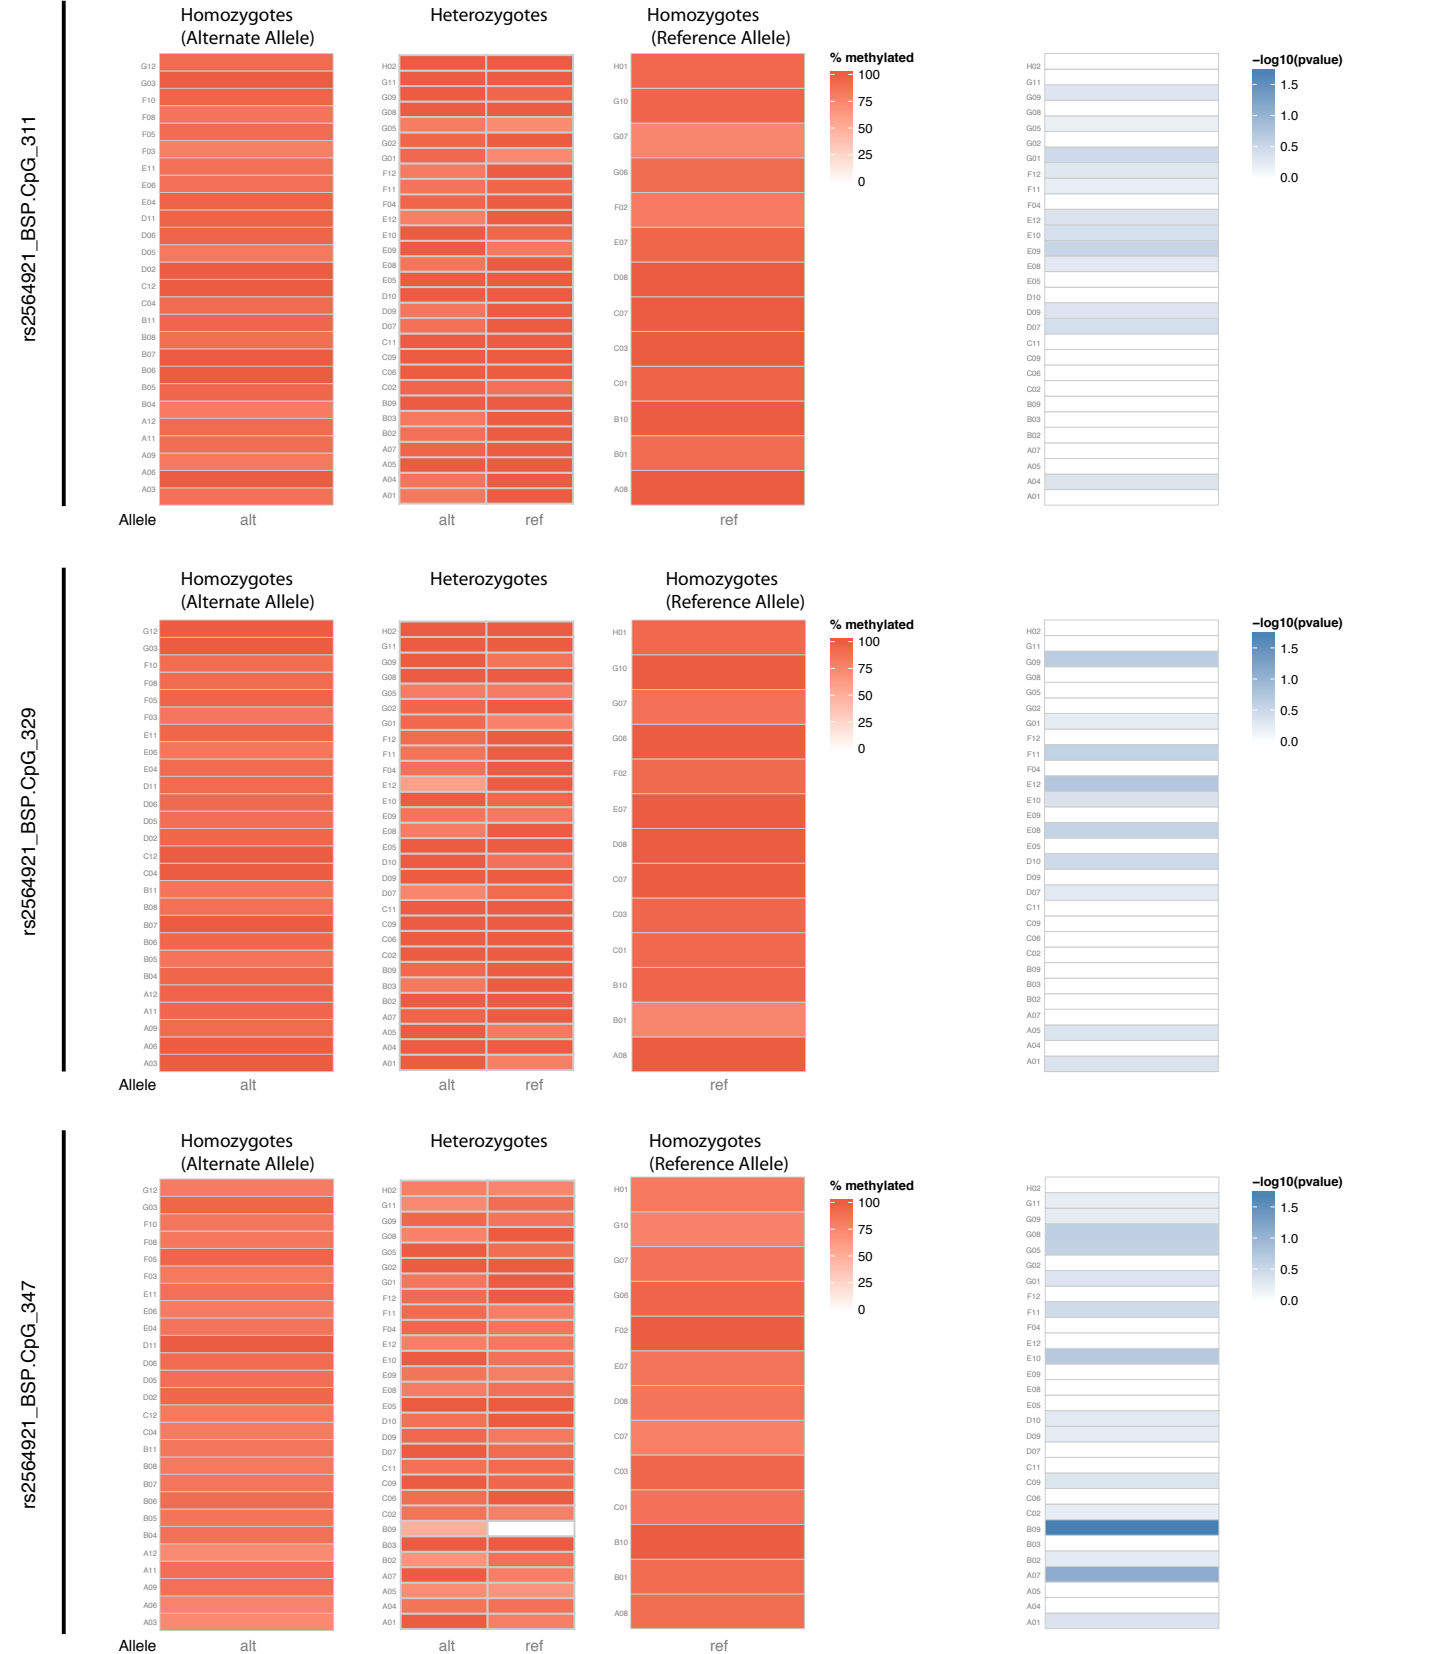

Figure S4 (continued)

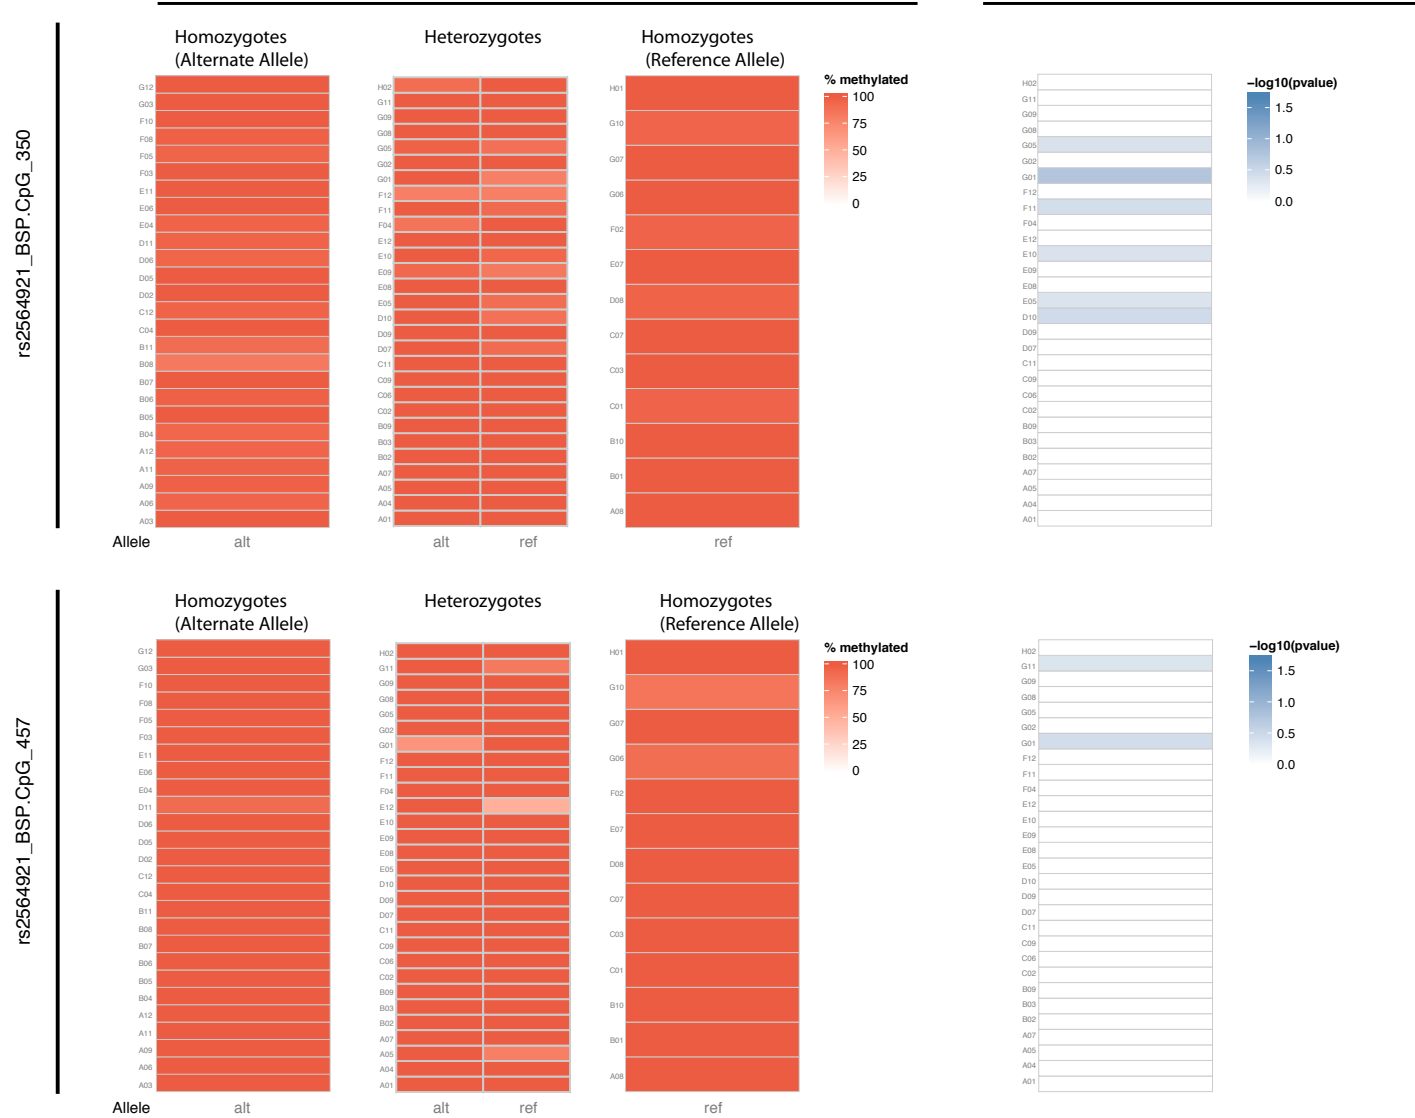

Figure S4 (continued)

D

Genotype Associated CpG Methylation

Heterozygote ASM Probability

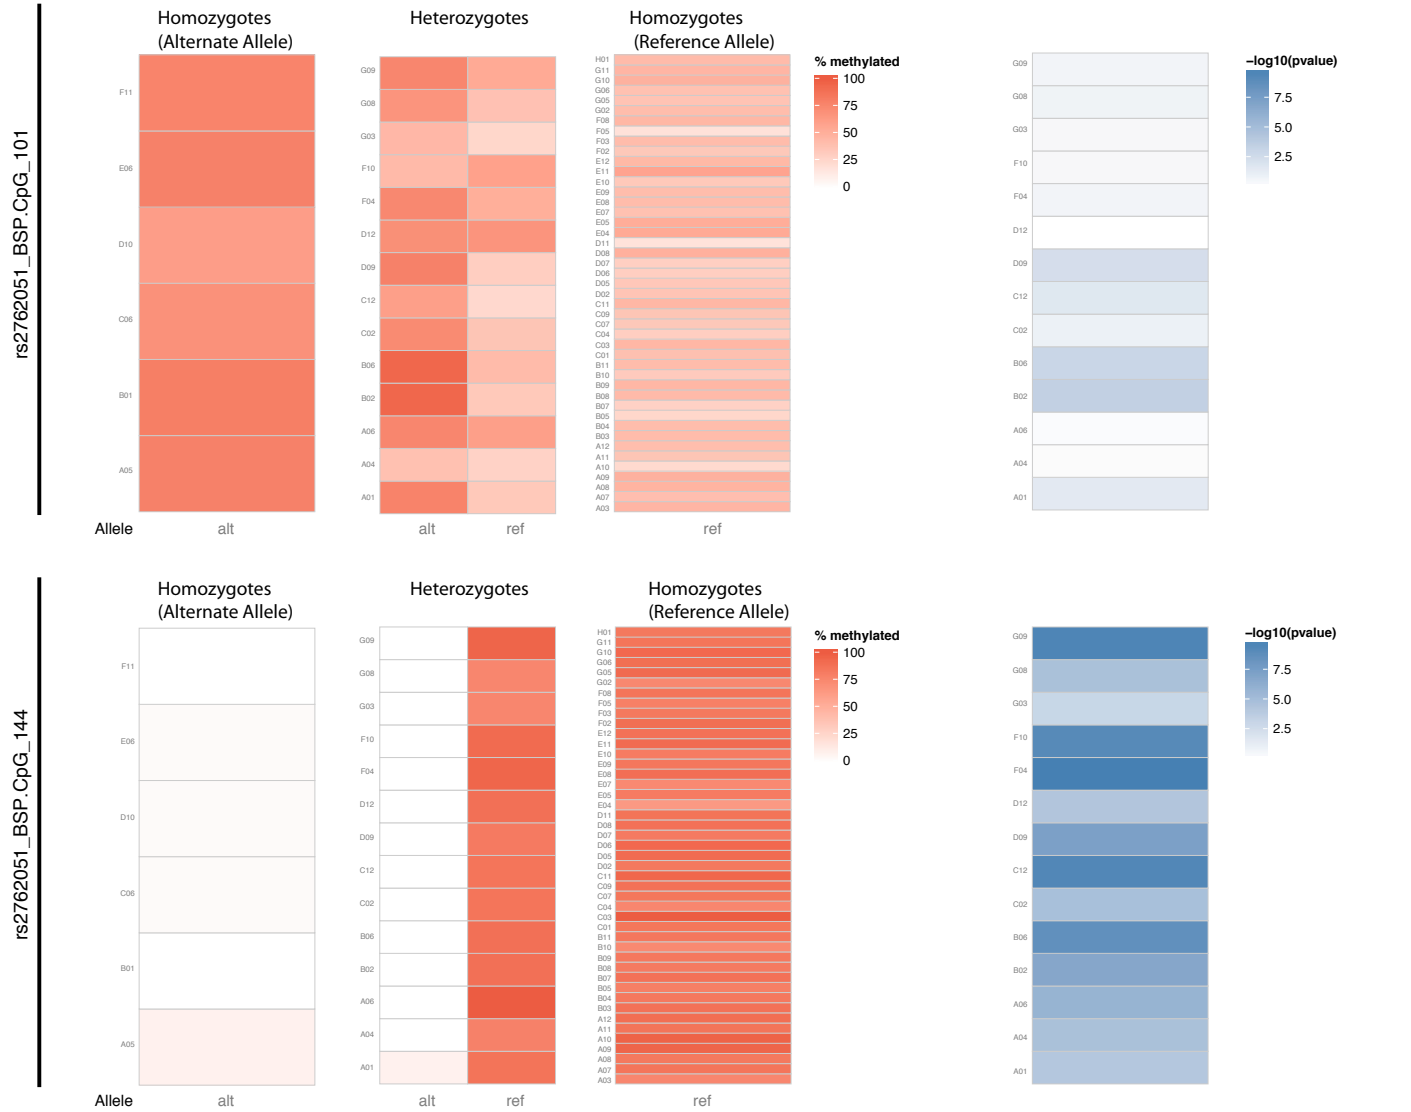

E

Genotype Associated CpG Methylation

Heterozygote ASM Probability

rs3738154\_BSP.CpG\_27

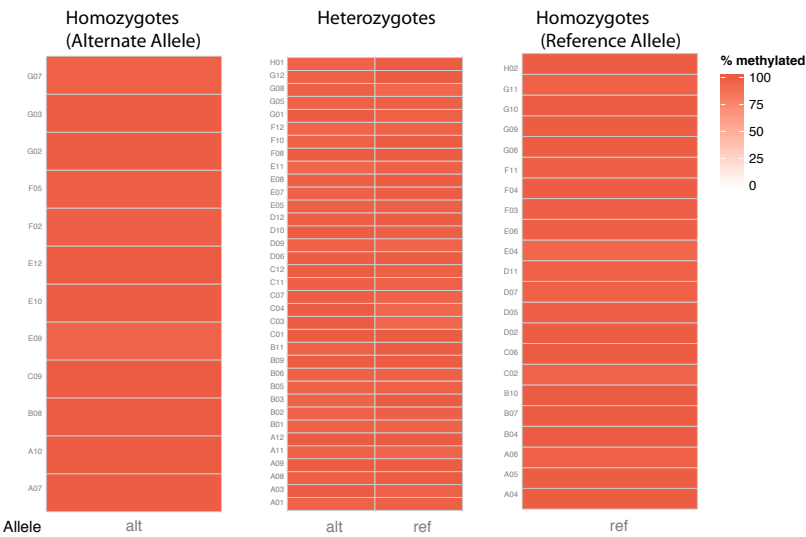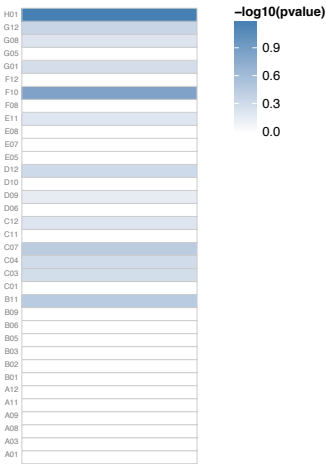

rs3738154\_BSP.CpG\_73

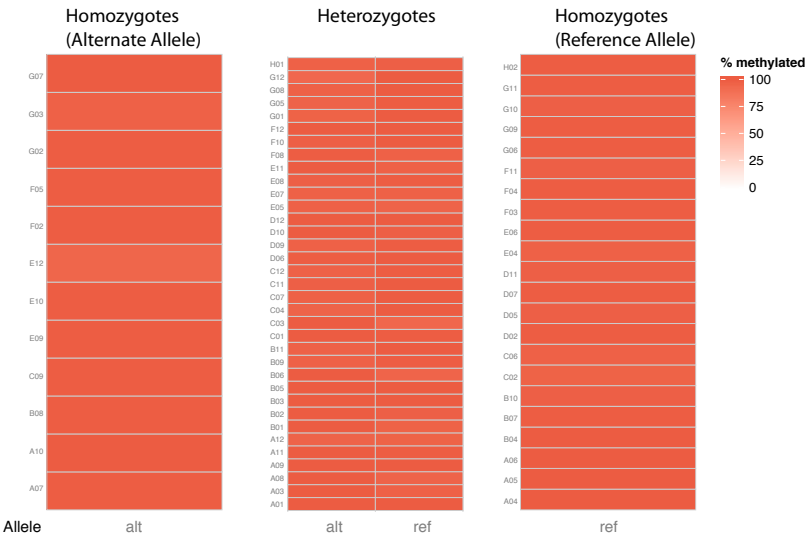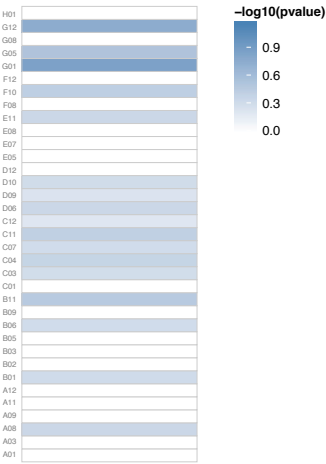

rs3738154\_BSP.CpG\_118

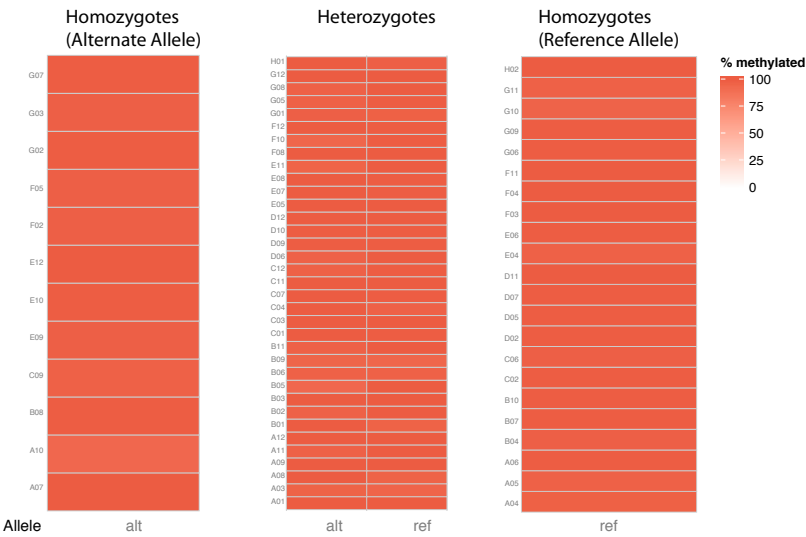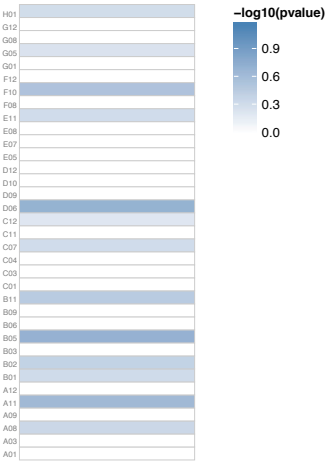

Figure S4 (continued)

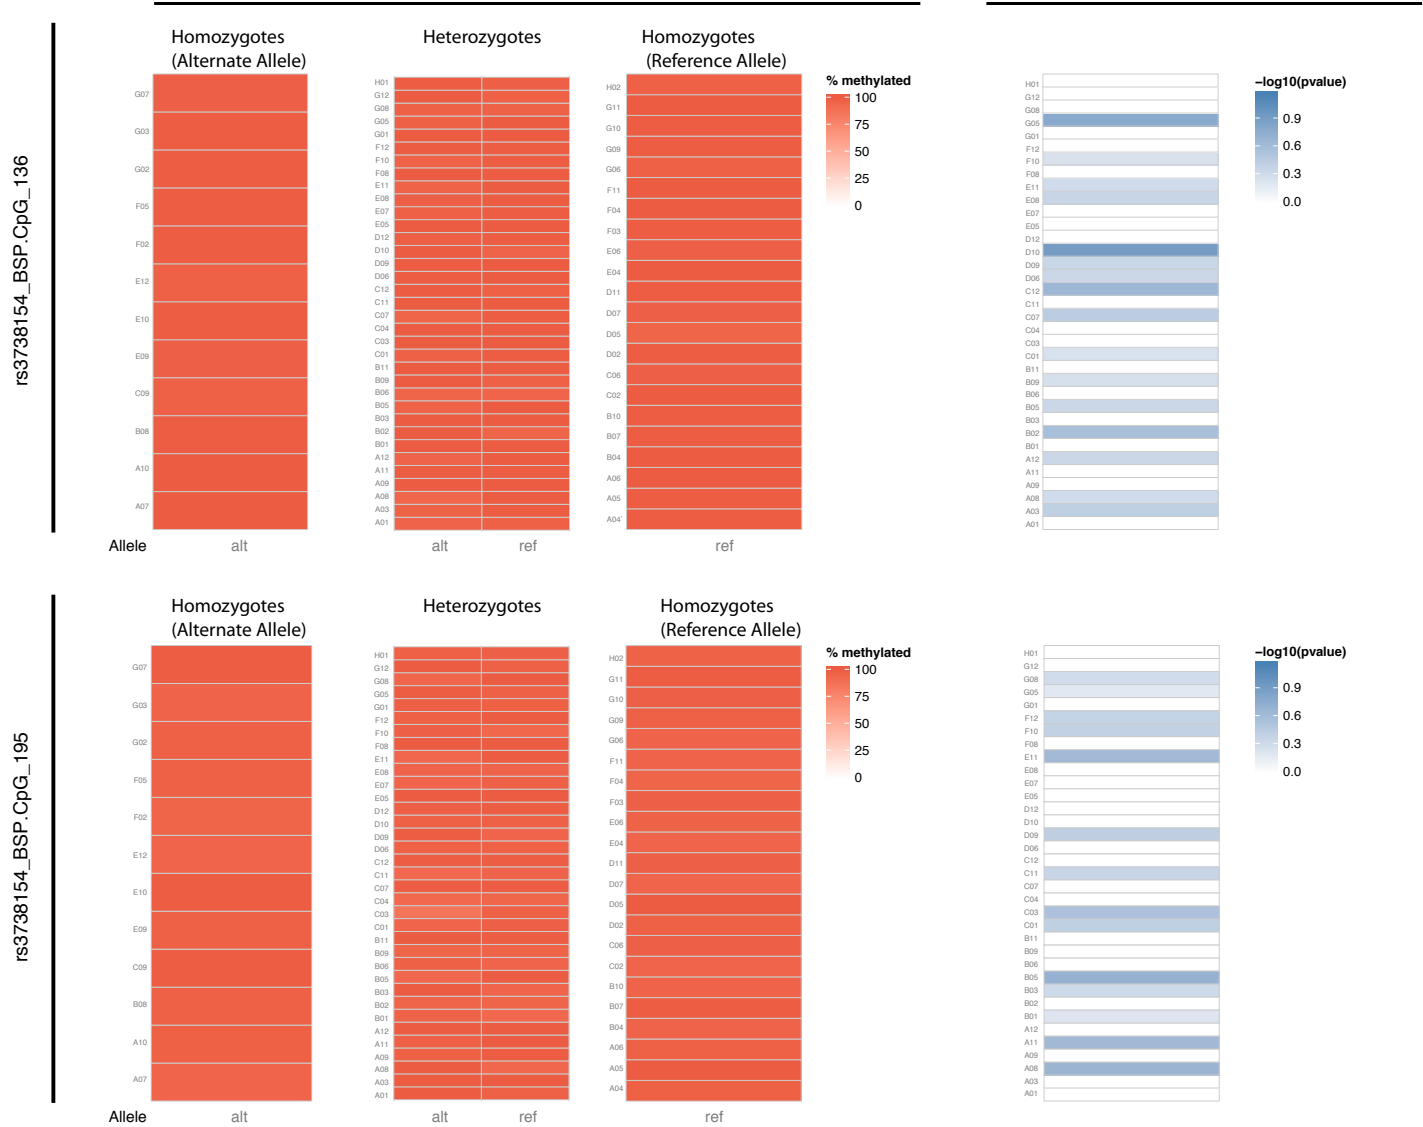

Figure S4 (continued)

F

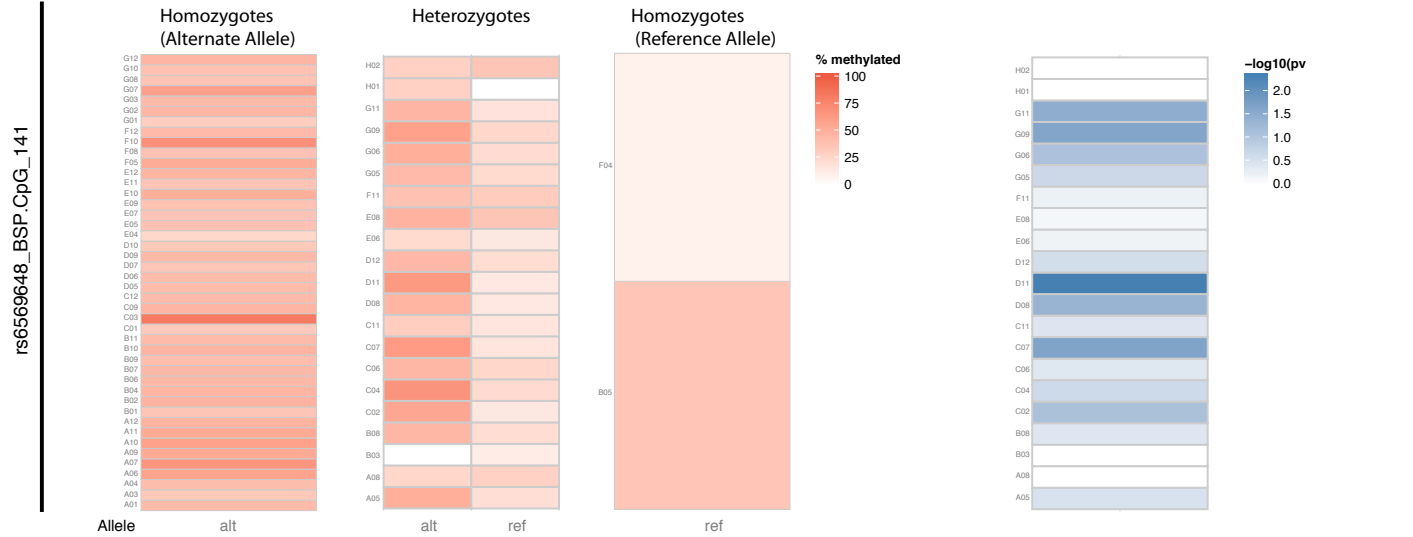



Figure S4 (continued)

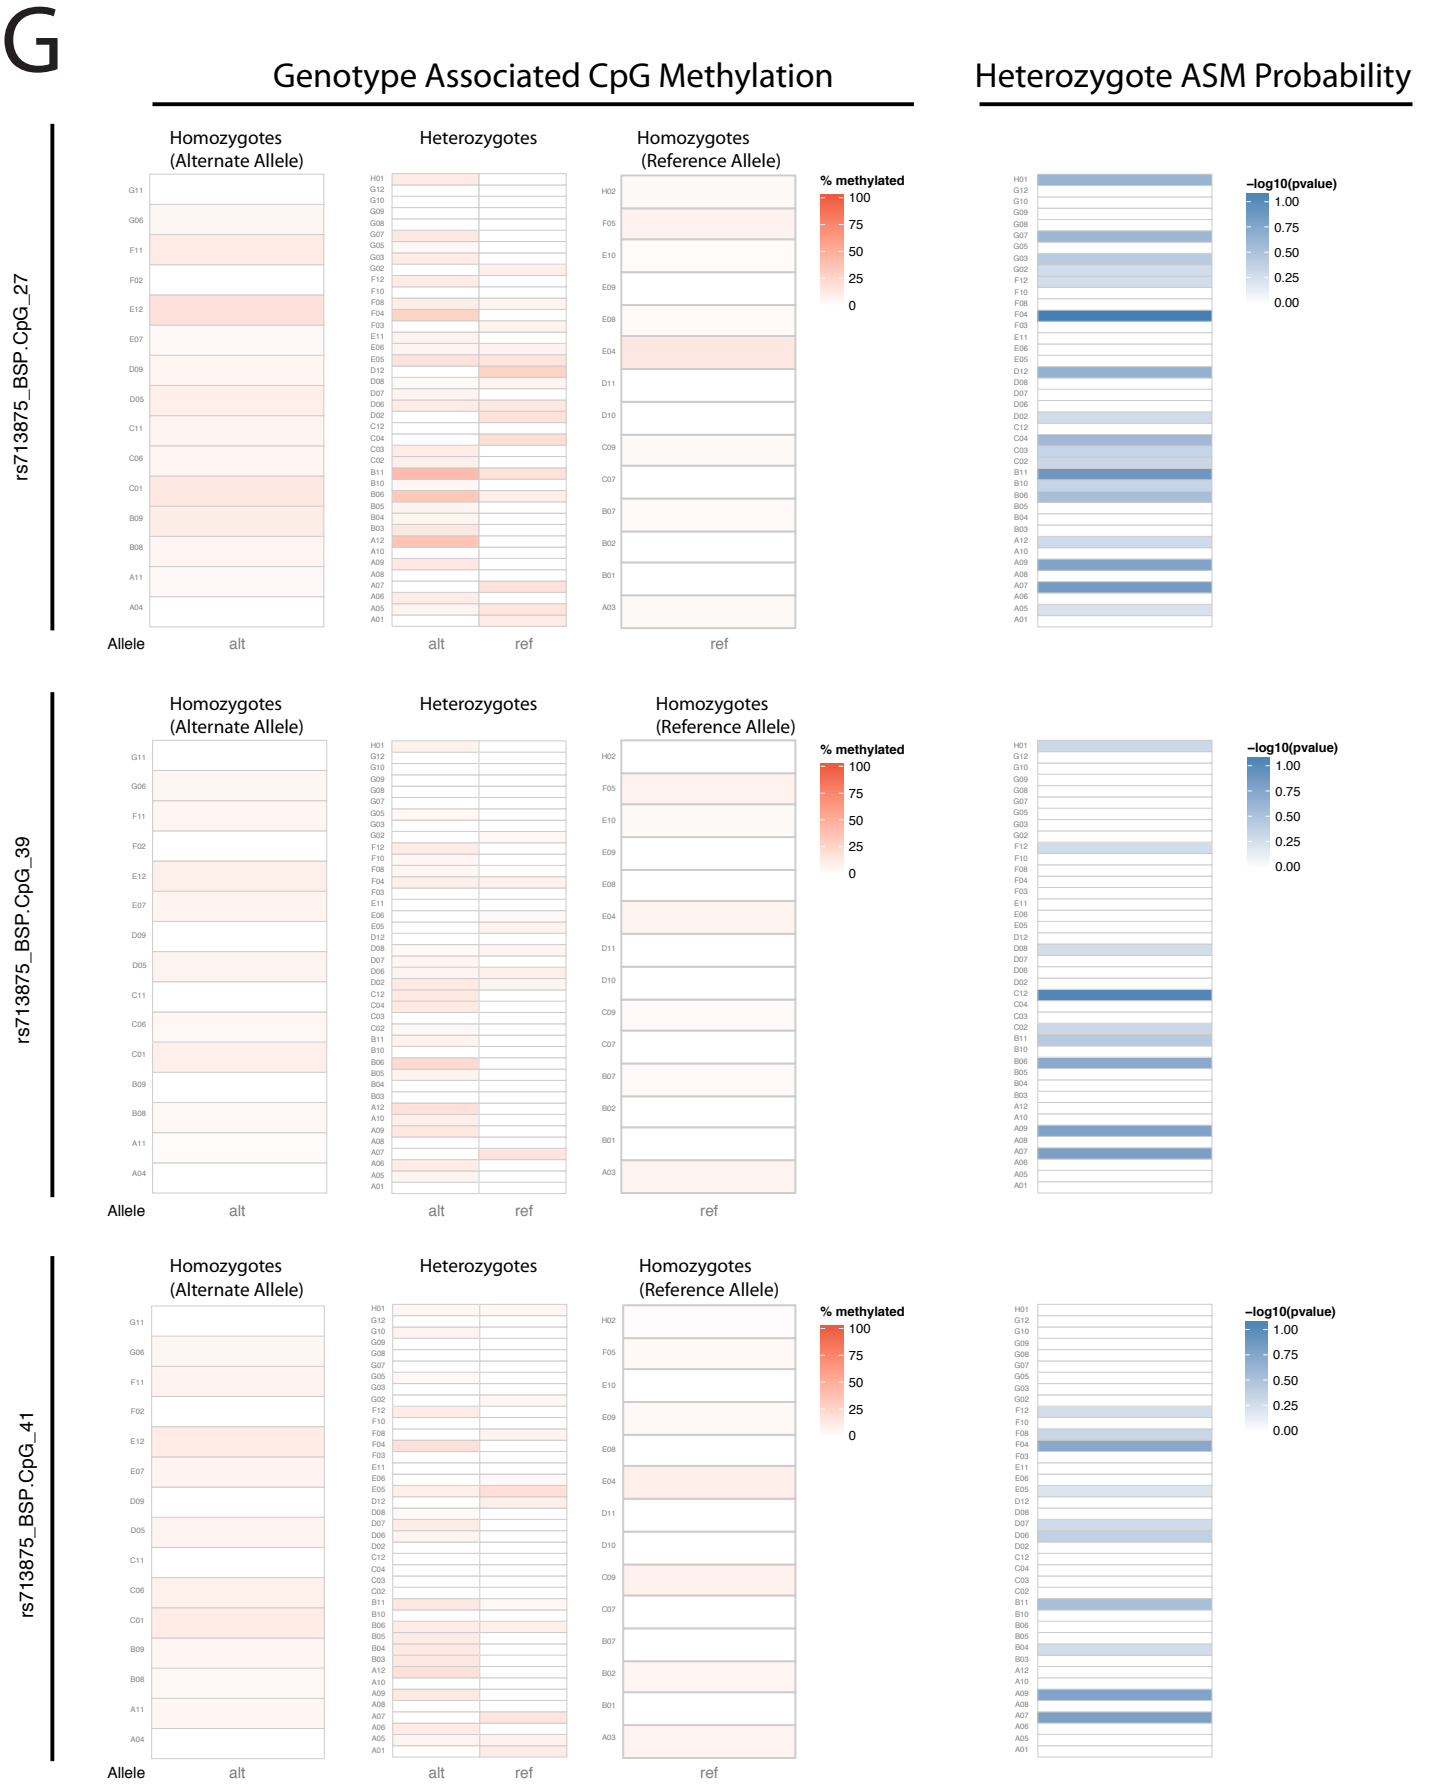

Supplemental Figure 9 (continued)

rs713875\_BSP.CpG\_51

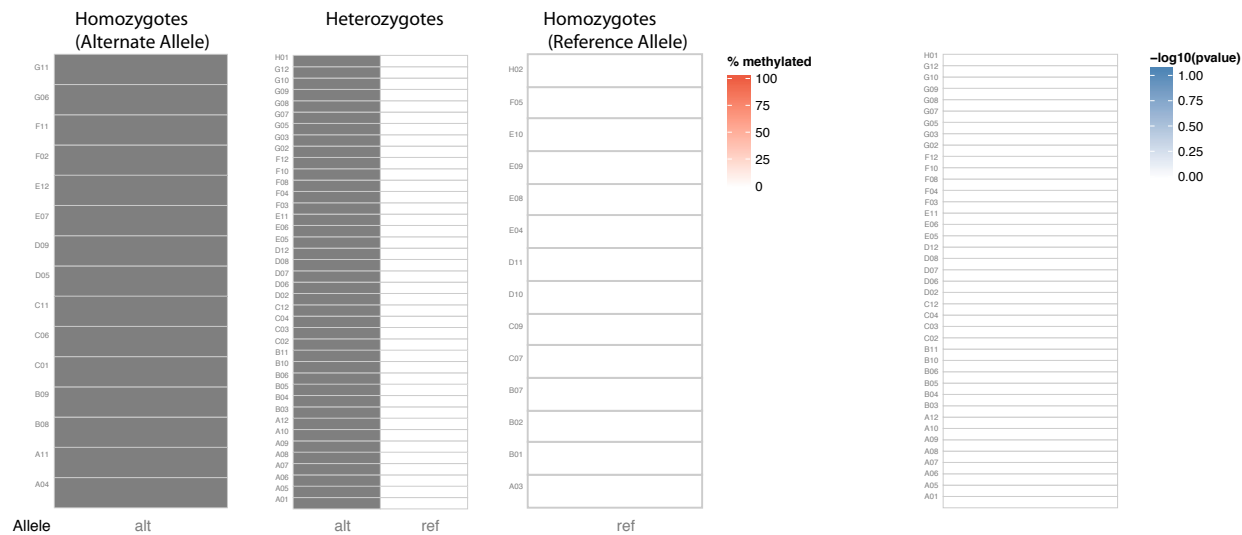

rs713875\_BSP.CpG\_57

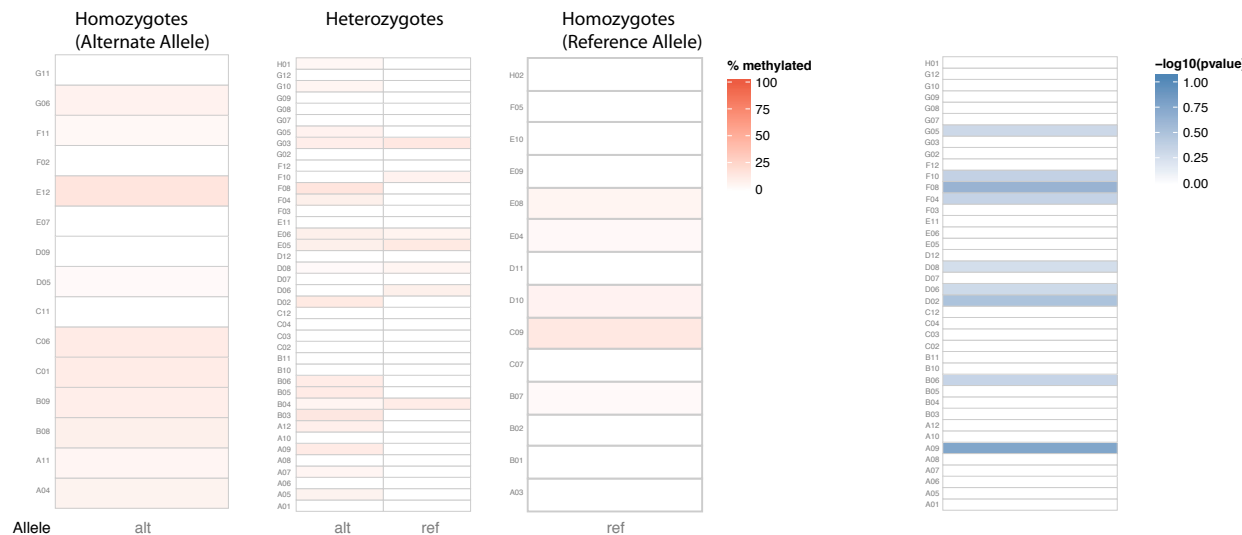

rs713875\_BSP.CpG\_435

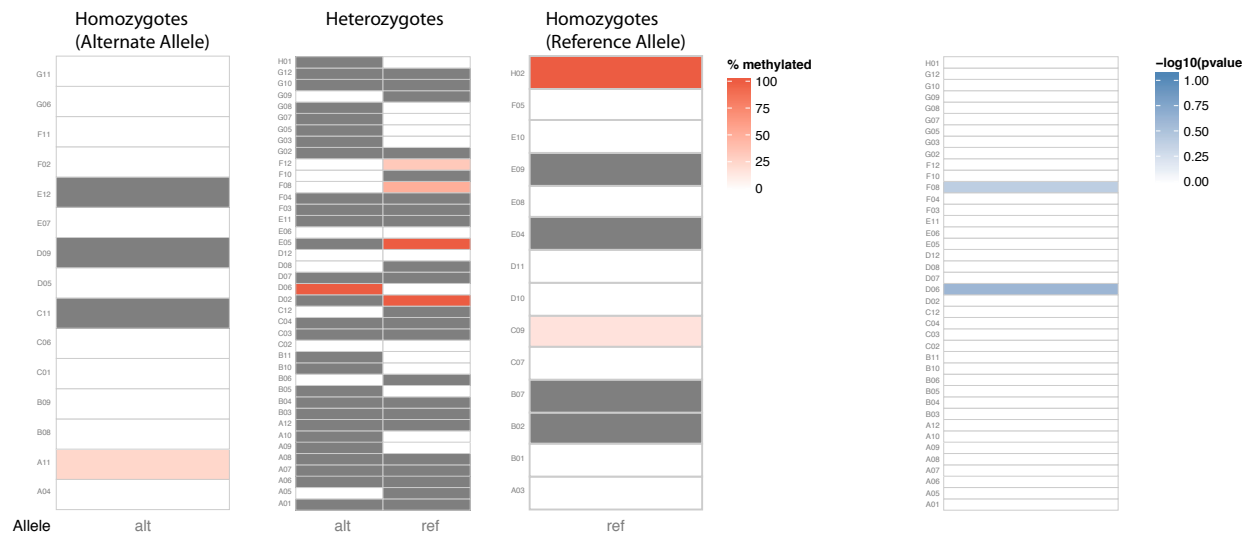

Figure S4 (continued)

rs713875\_BSP.CpG\_510

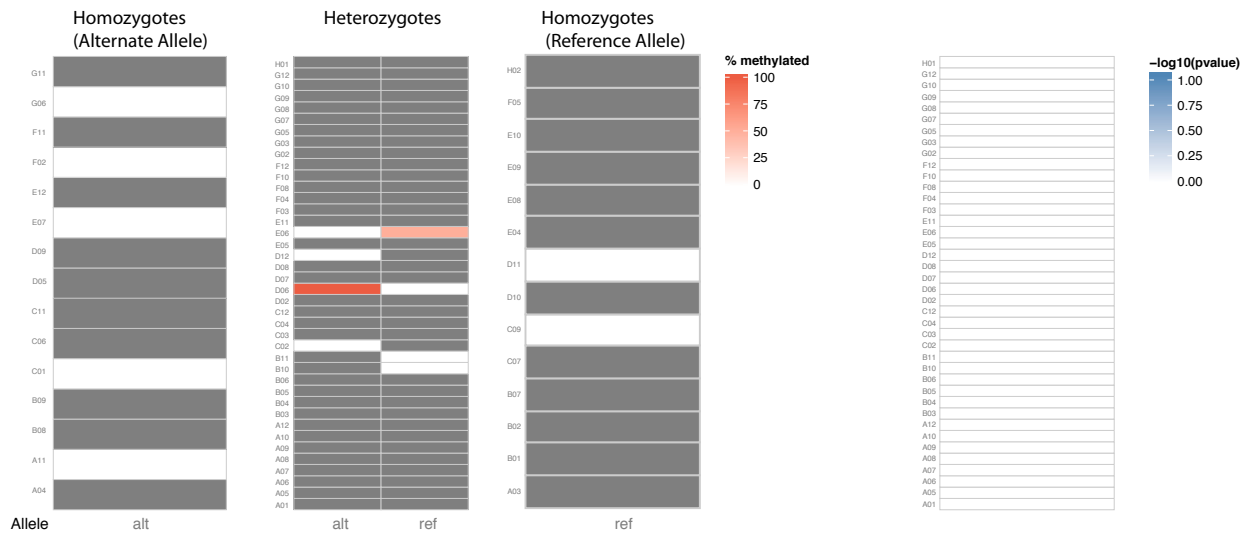



Figure S4 (continued)

rs943049A\_BSP.CpG\_139

Genotype Associated CpG Methylation

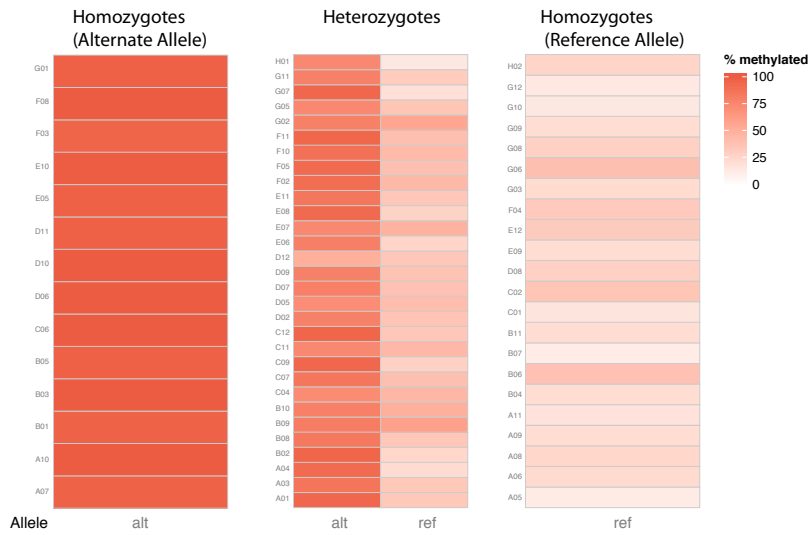

Heterozygote ASM Probability

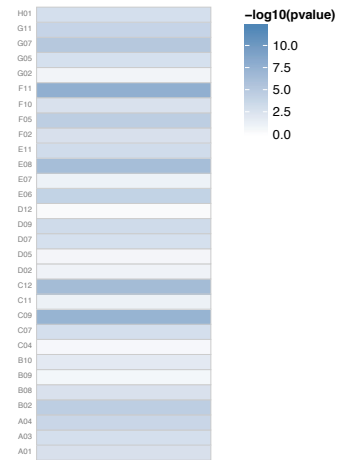

rs943049A\_BSP.CpG\_148

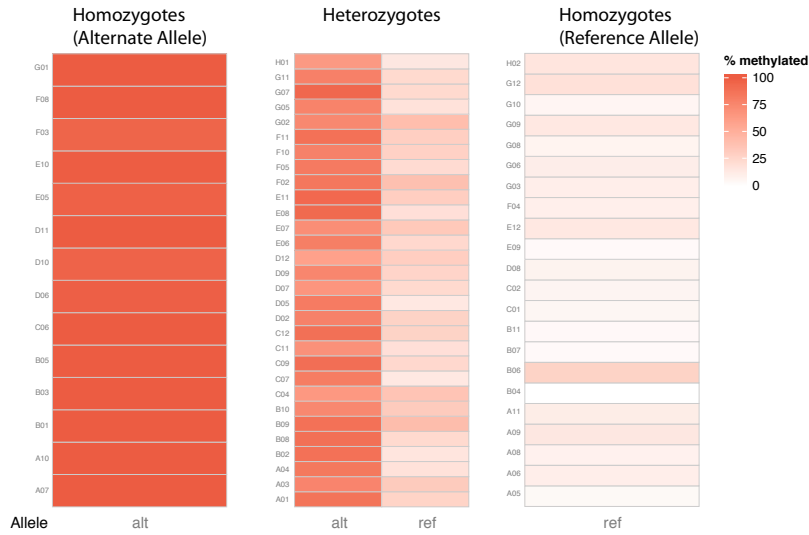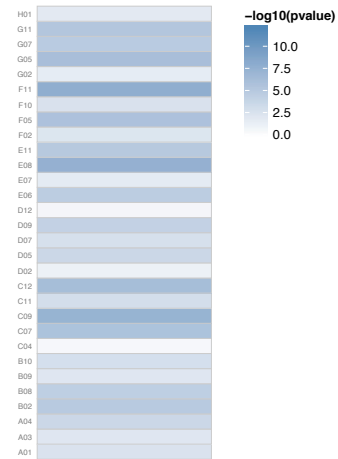

rs943049A\_BSP.CpG\_190

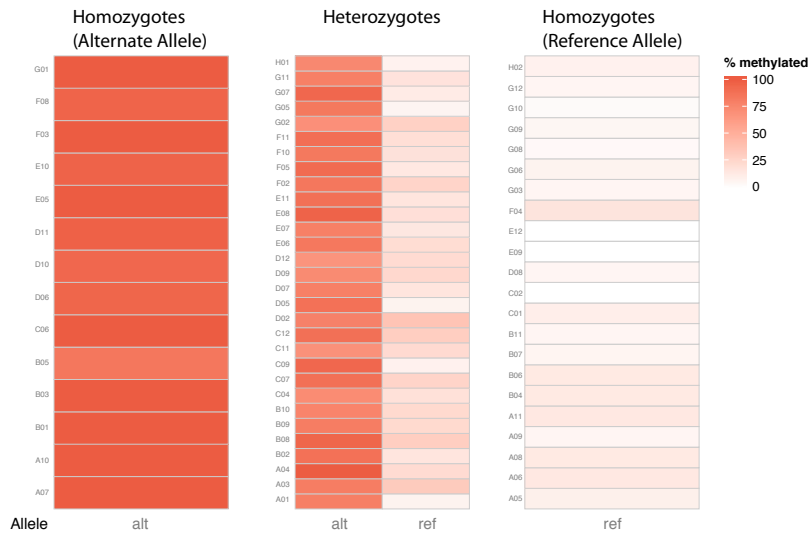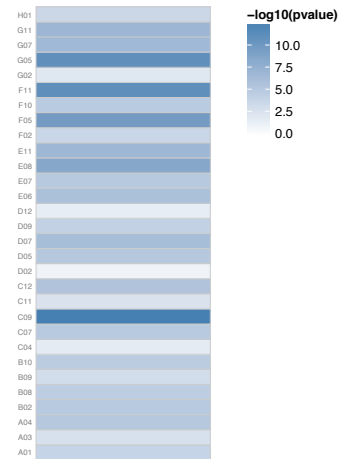

Supplemental Figure 9 (continued)

rs943049A\_BSP.CpG\_350

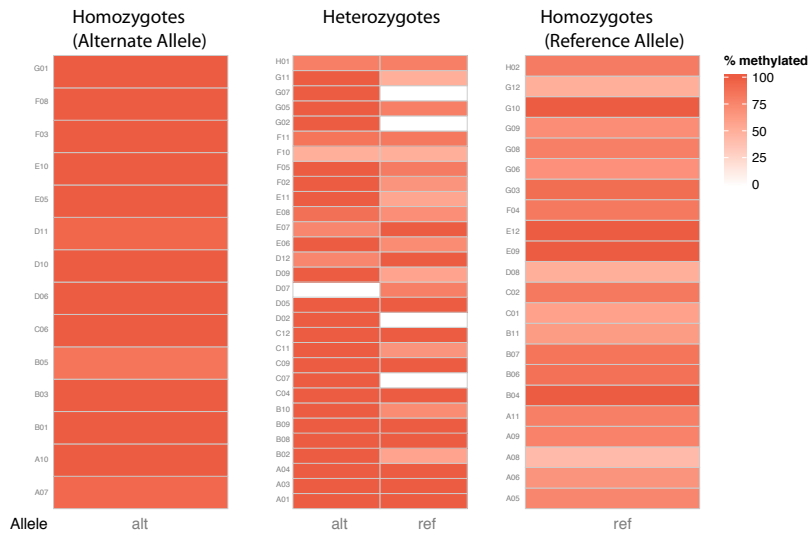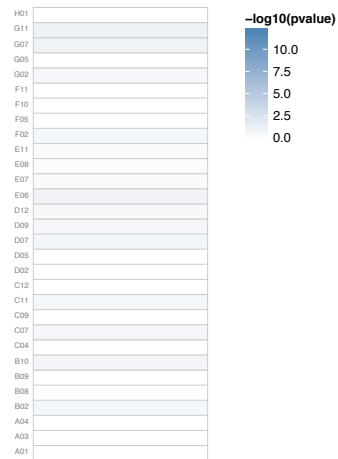

rs943049A\_BSP.CpG\_72

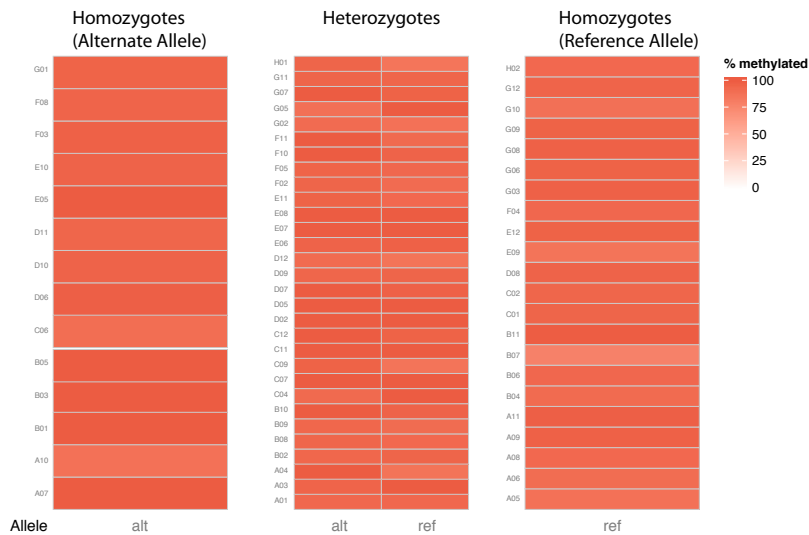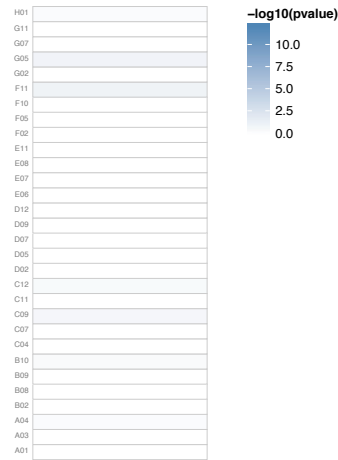

Figure S4 (continued)

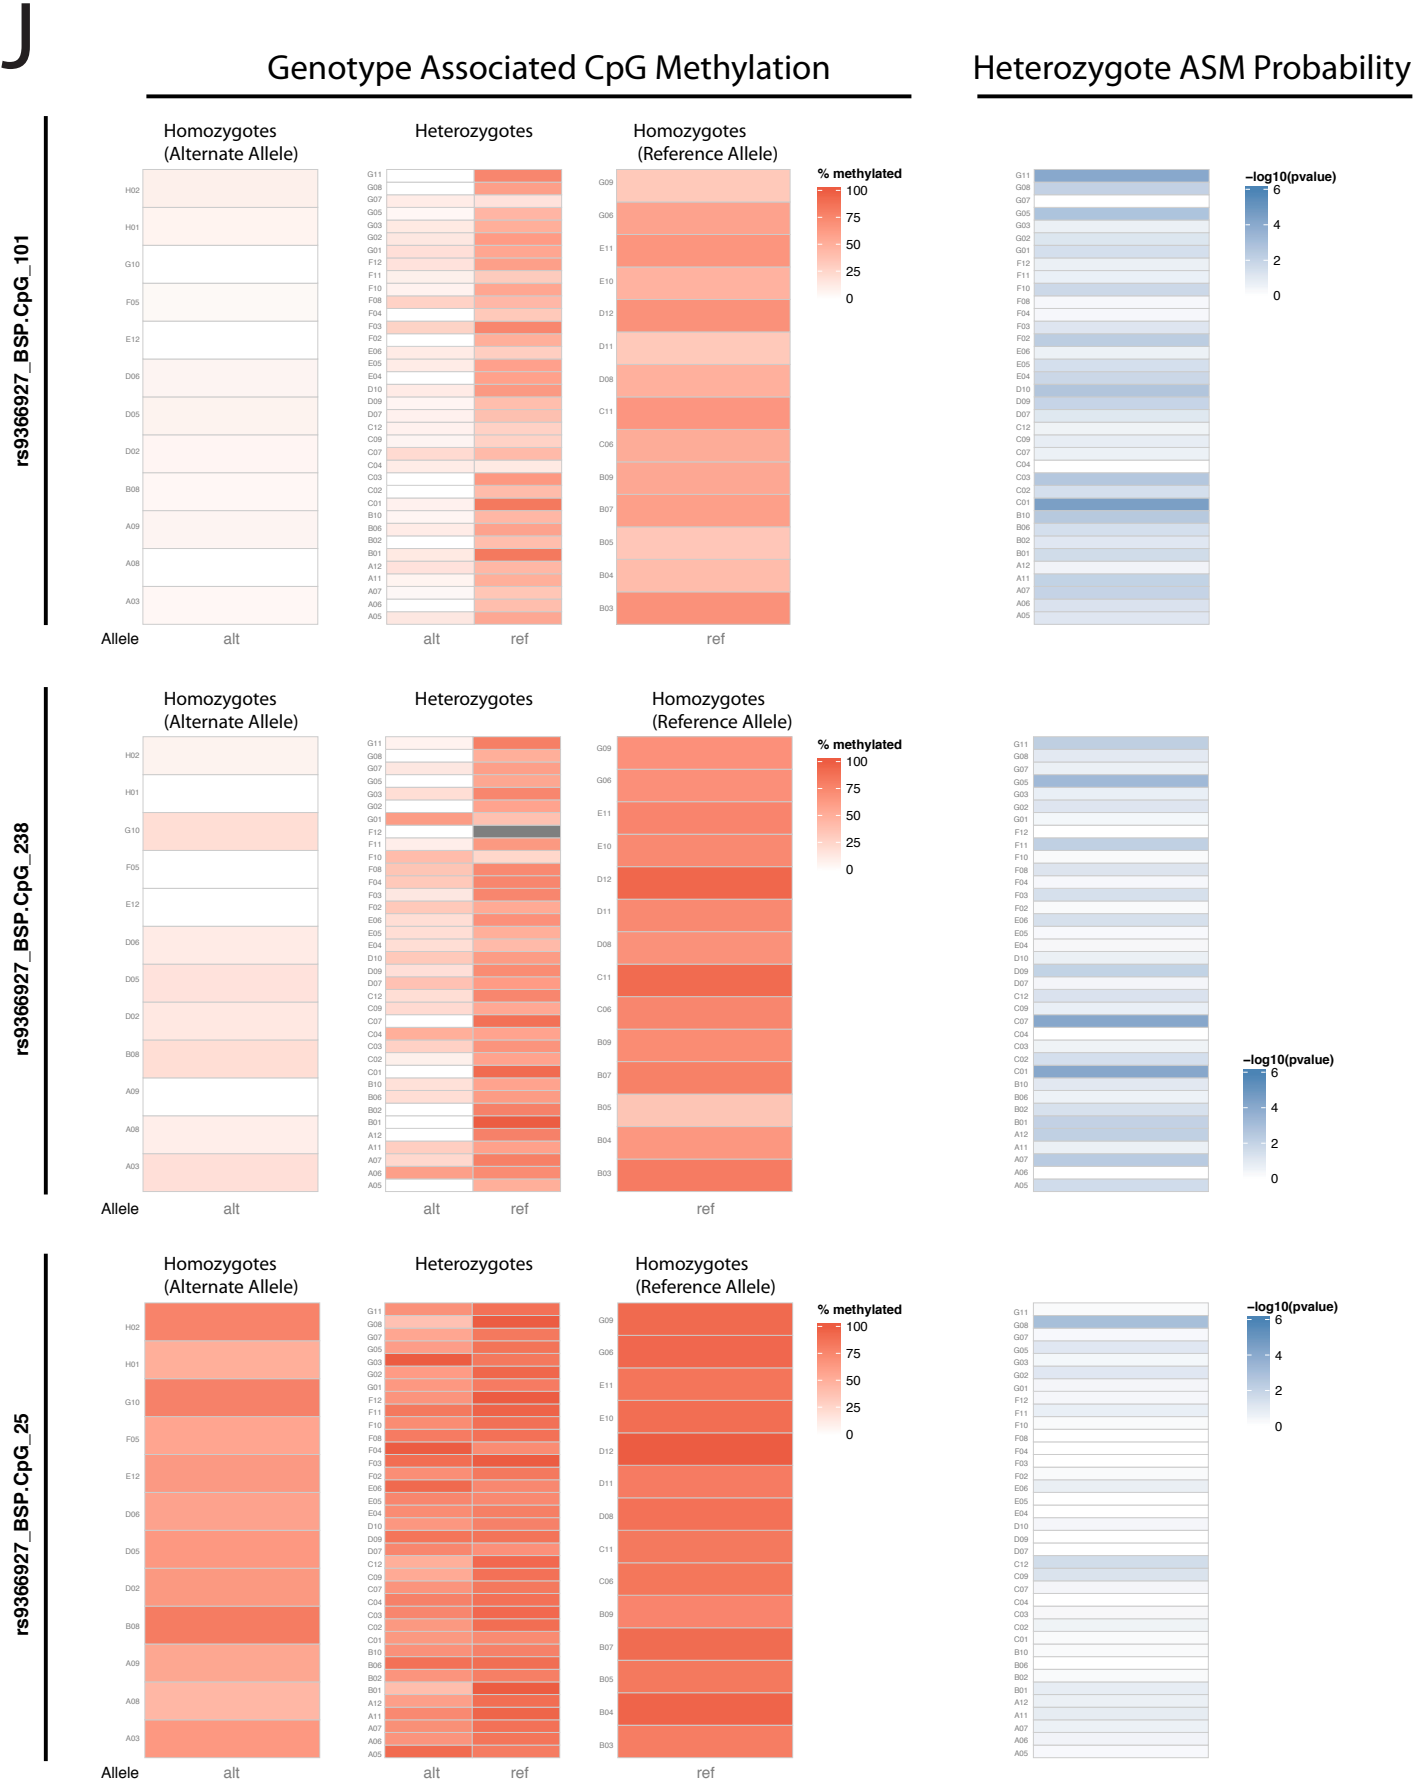

Supplemental Figure 9 (continued)

rs9366927\_BSP.CpG\_37

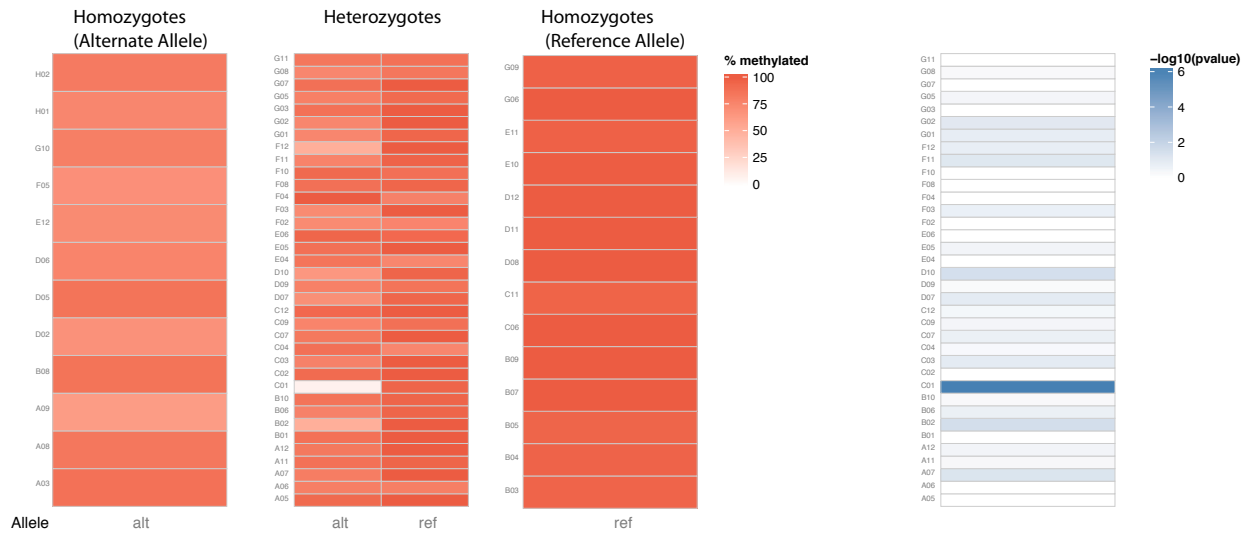

rs9366927\_BSP.CpG\_49

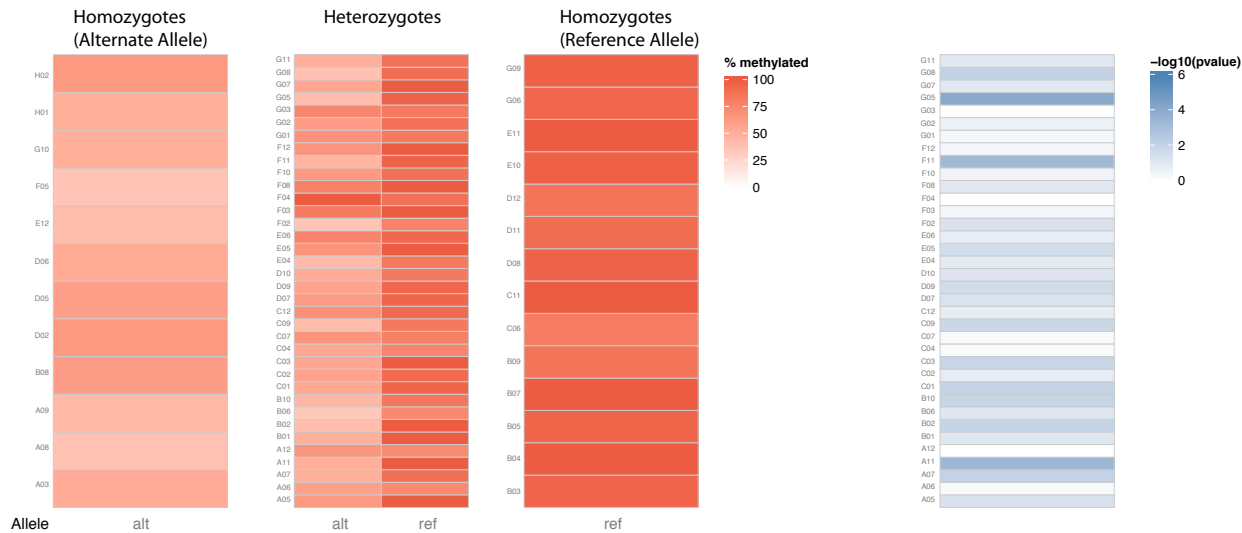

rs9366927\_BSP.CpG\_58

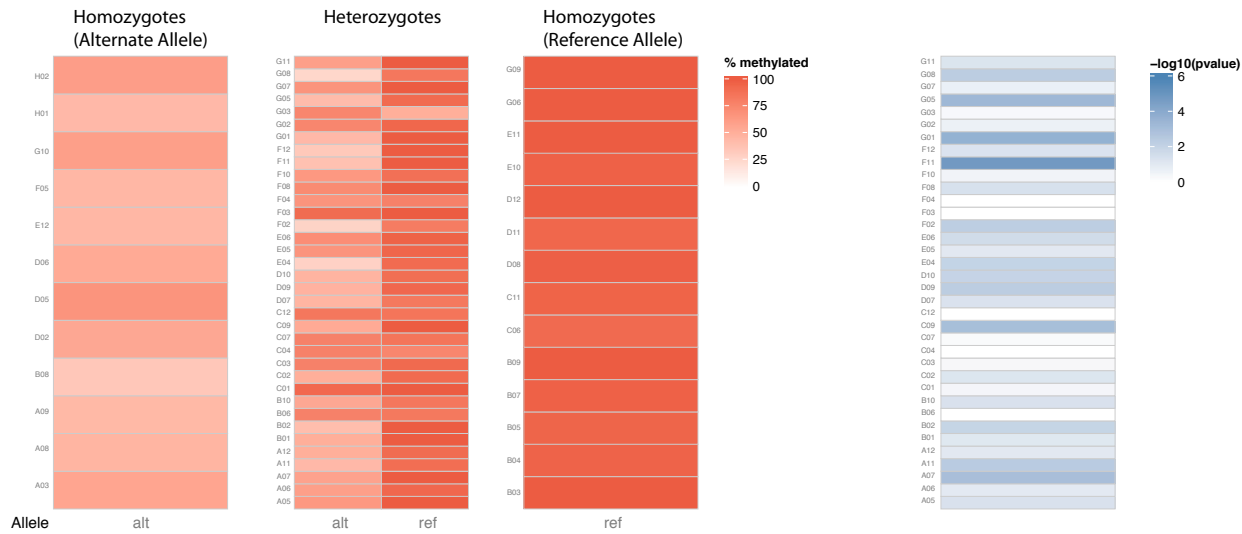



Figure S4 (continued)

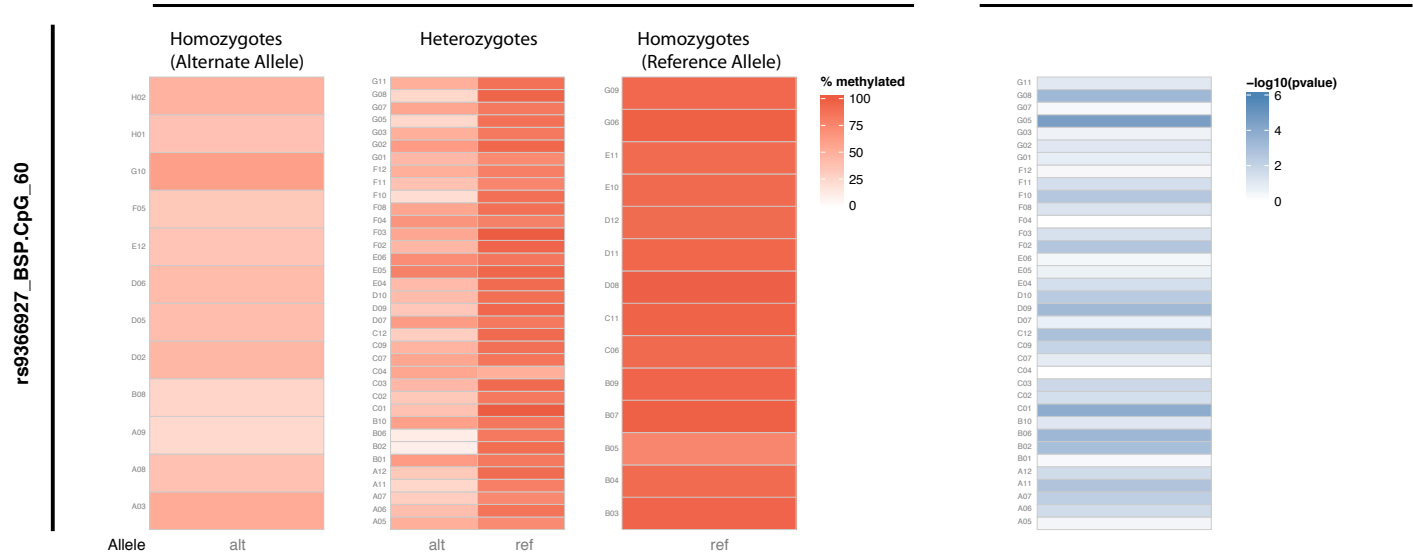

Supplement: Supplementary file [file 1]
