# Supplementary material
Source: publisher figshare collection journal article supplement (https://plos.figshare.com/articles/dataset/_/1050853)

Figure S16

A

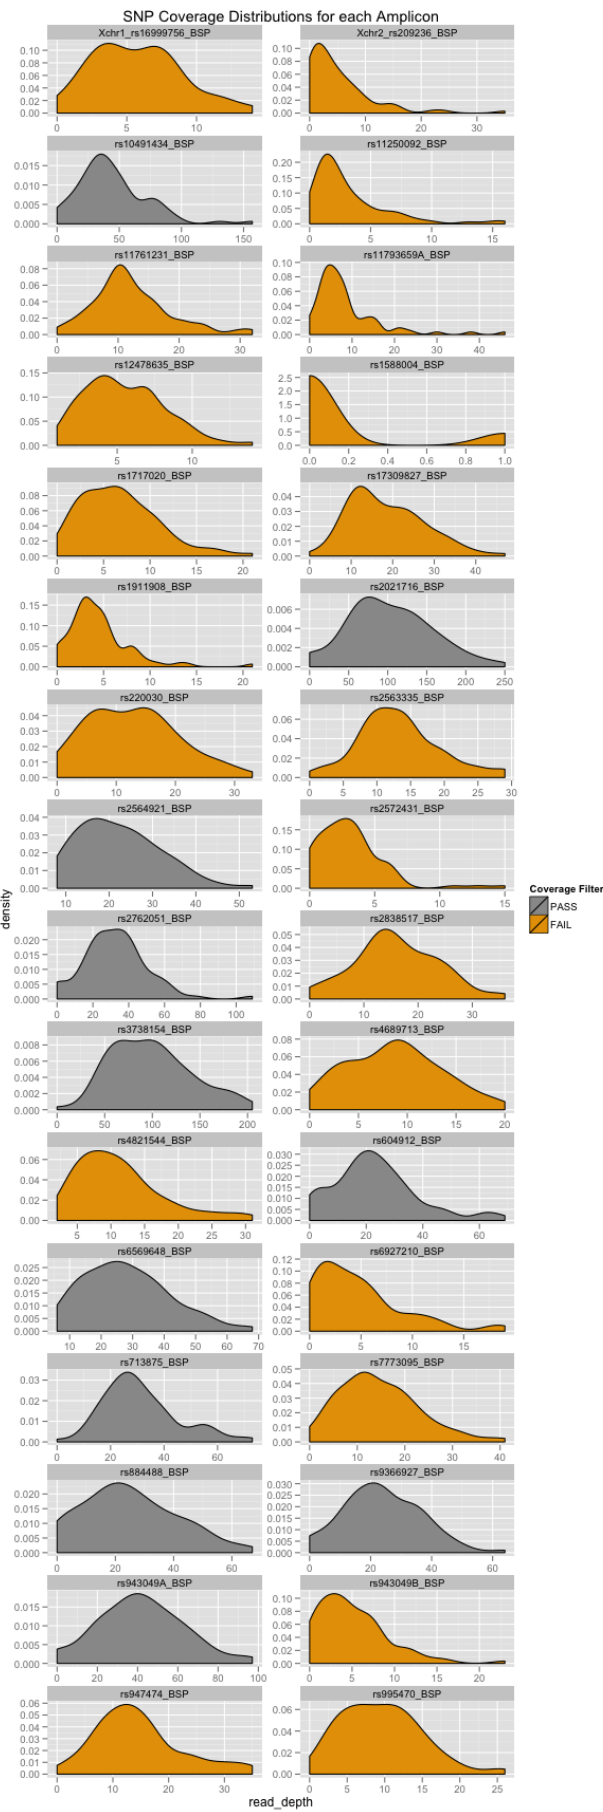

B

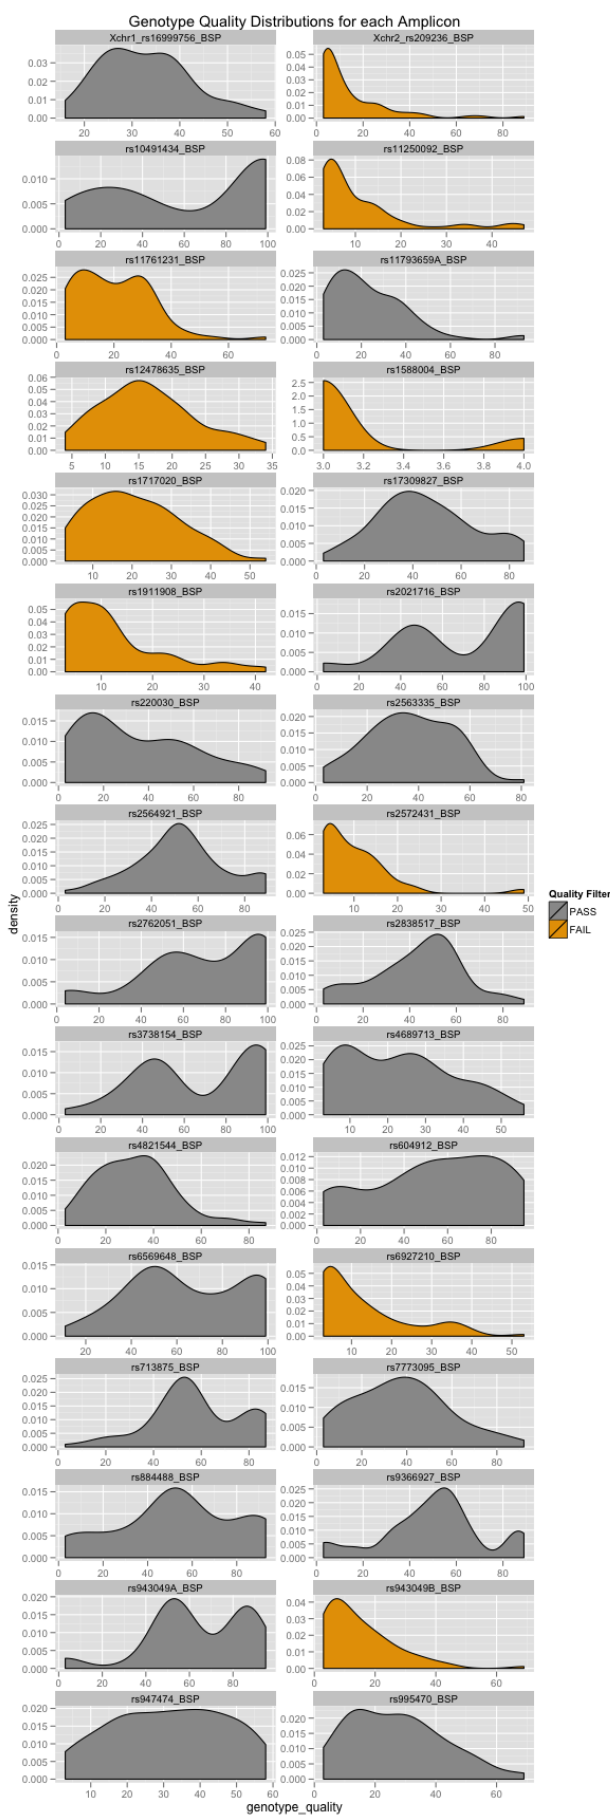

Figure S16 (continued)

C

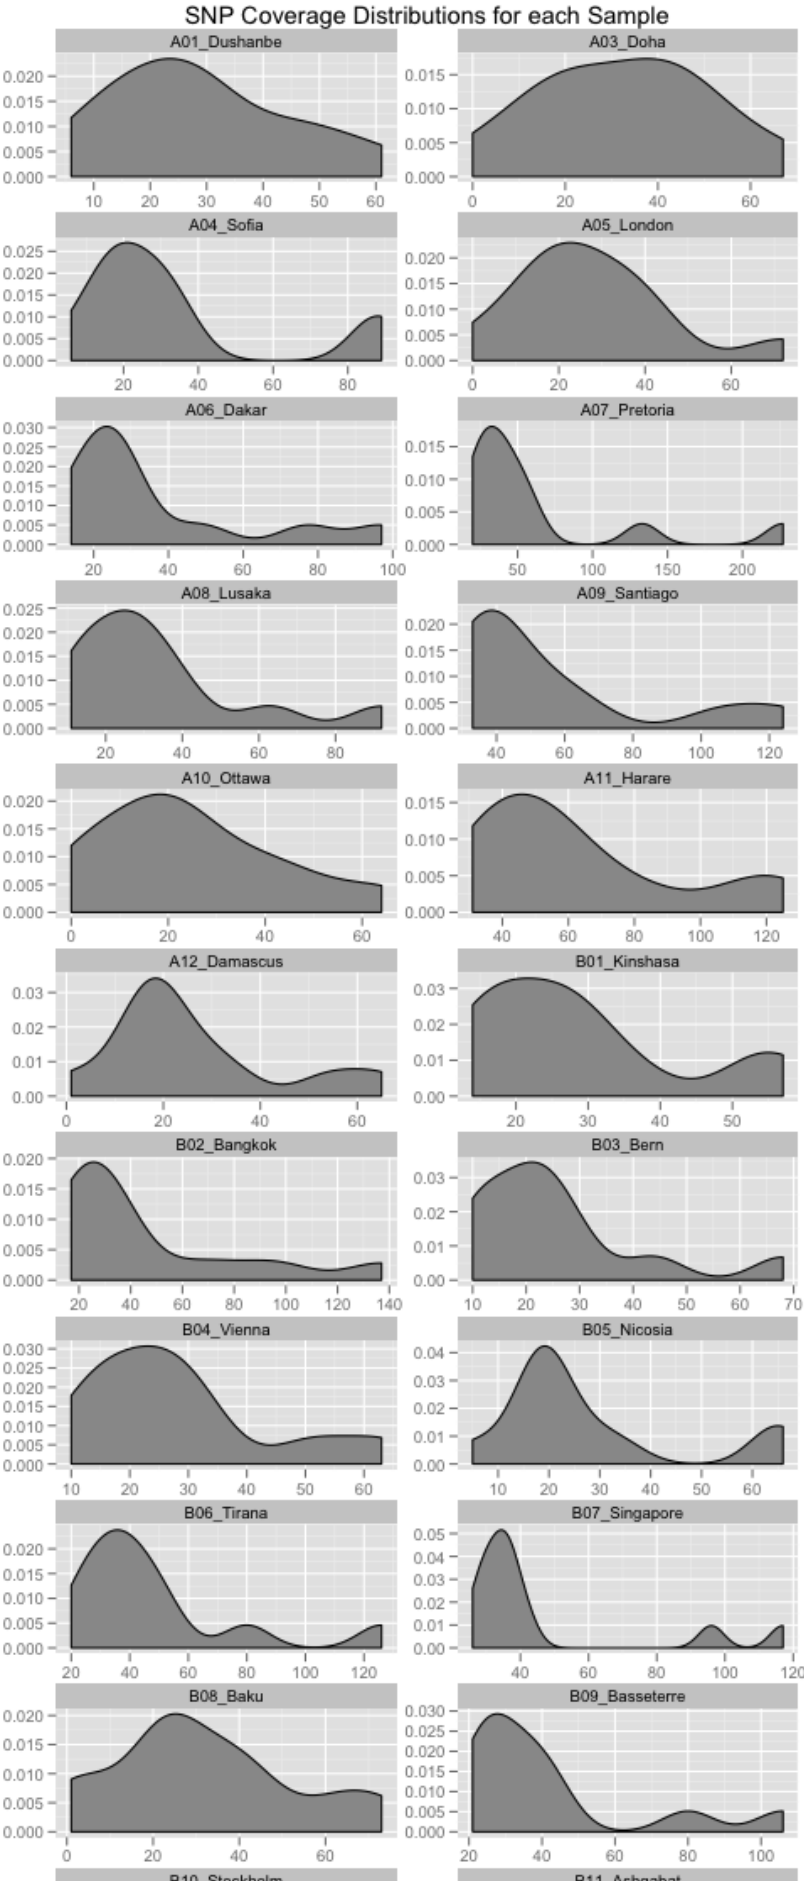

Figure S16 (continued)

D

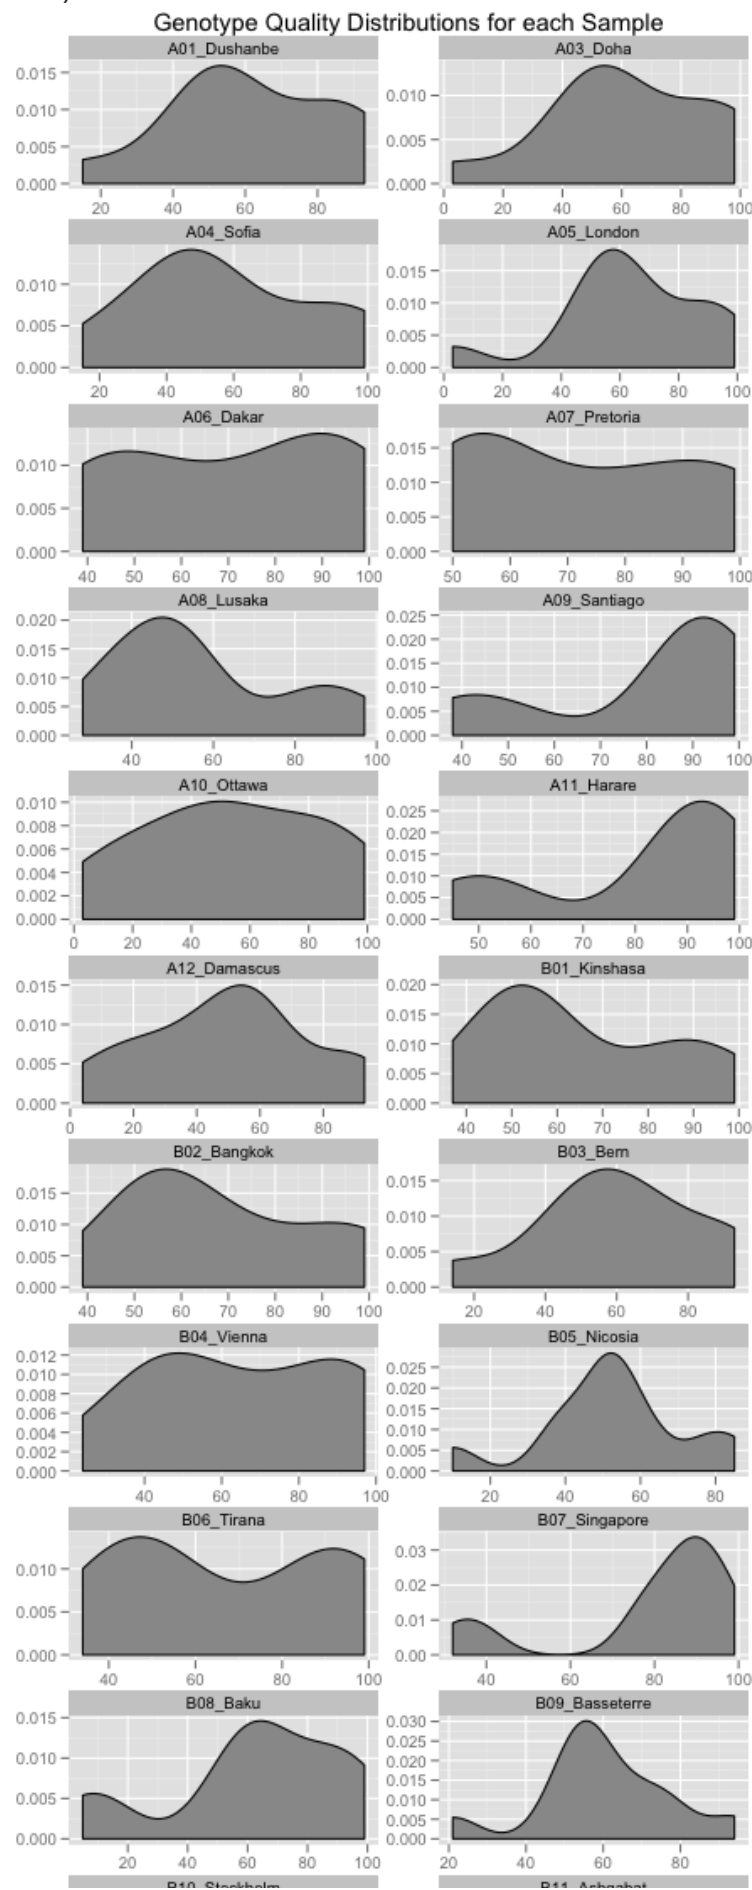

Supplement: Supplementary file [file 1]
