# Supplementary material
Source: publisher figshare collection journal article supplement (https://plos.figshare.com/articles/dataset/_/1050853)

Figure S13

**A**

**Unnormalized ProbeA Intensities for Replicates of 1:1 Methylated(E44):Unmethylated(H16) Control Mix**

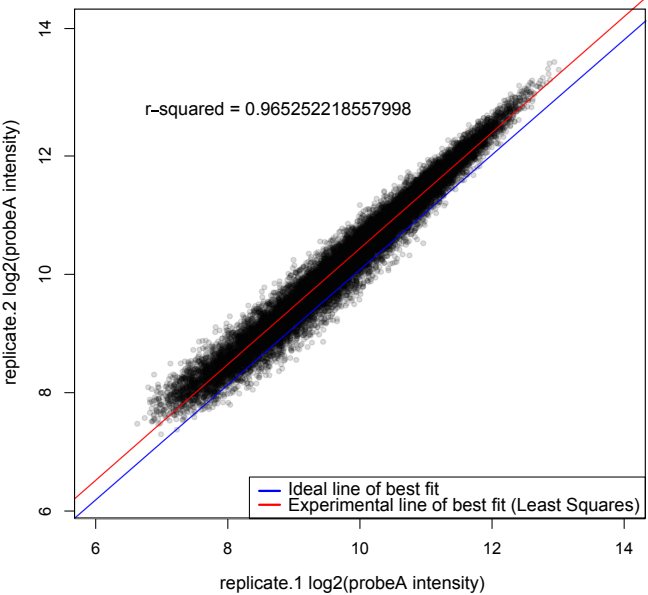

**B**

**Normalized ProbeA Intensities for Replicates of 1:1 Methylated(E44):Unmethylated(H16) Control Mix**

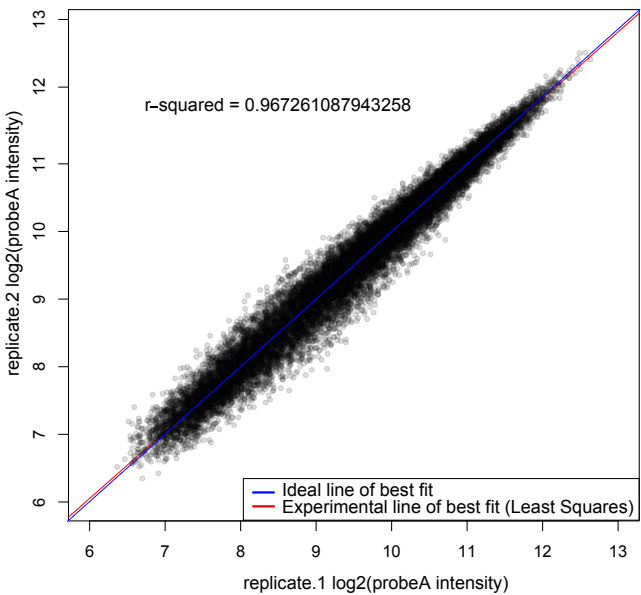

**C**

**Unnormalized ProbeA Intensities for Replicates of 1:1 Methylated(H16):Unmethylated(E44) Control Mix**

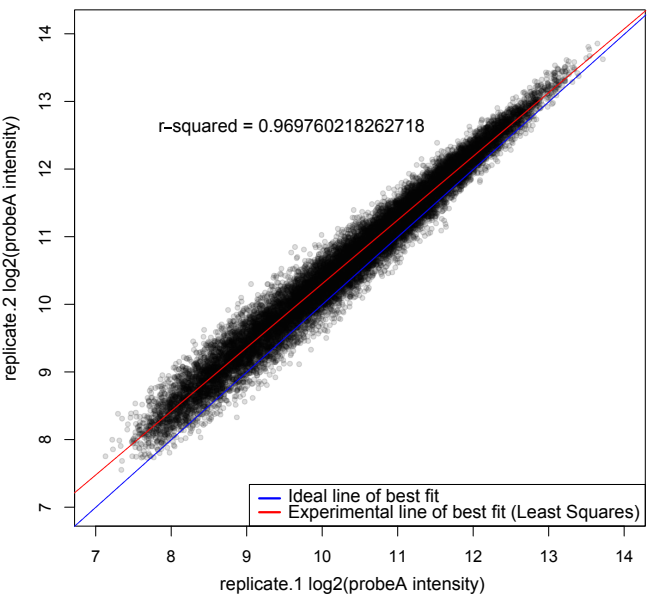

**D**

**Normalized ProbeA Intensities for Replicates of 1:1 Methylated(H16):Unmethylated(E44) Control Mix**

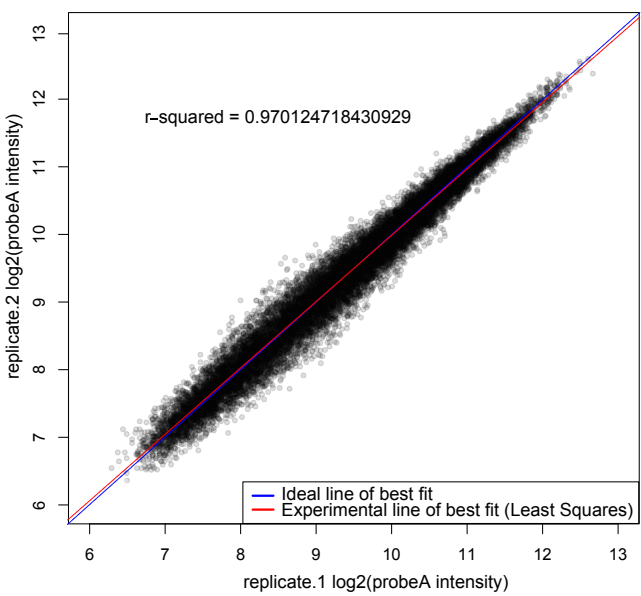

Supplement: Supplementary file [file 1]
