# Supplementary material
Source: publisher figshare collection journal article supplement (https://plos.figshare.com/articles/dataset/_/1050853)

Figure S10

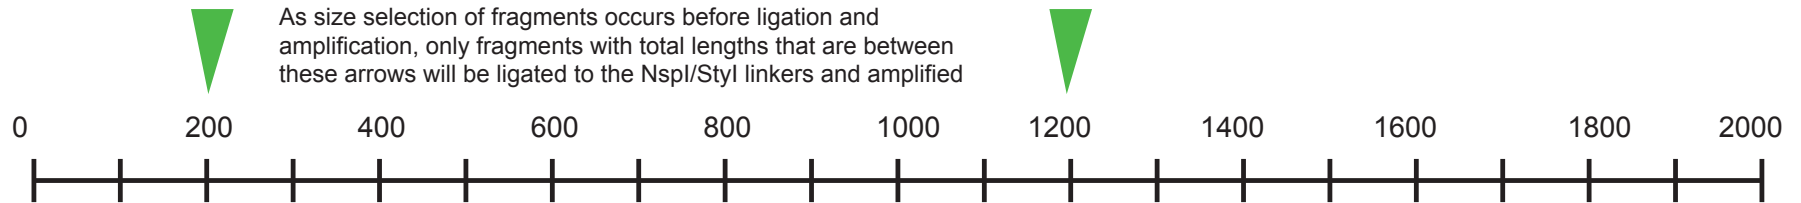

## 1st alternative

**BOTH Styl and Nspl fragments must have:**

total lengths of 200-1200bp

no known MSRE sites

no known SNPs adding an MSRE site

no known SNPs which would change the number of Nspl/Styl sites

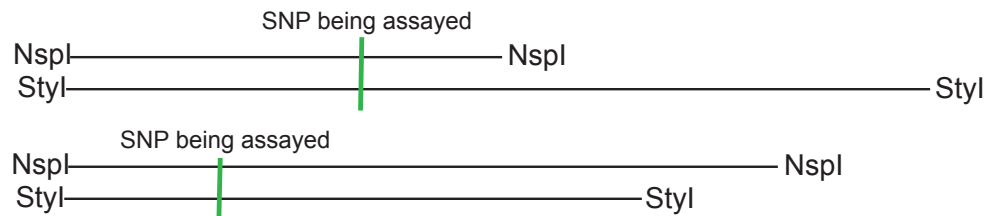

## 2nd alternative

**One fragment must have:**

a total length of 200-1200bp

no known MSRE sites

no known SNPs adding an MSRE site

no known SNPs that change the number of Nspl/Styl sites

**Other fragment may have:**

have a total length of more than 1200bp

an MSRE site

SNPs modifying the number of MSRE sites

no known SNPs that change the number of Nspl/Styl sites

(even if this fragment is digested by MSREs to be within the 200-1100bp size range, it will not have two Nspl/Styl sites available for ligation, so will not be amplified)

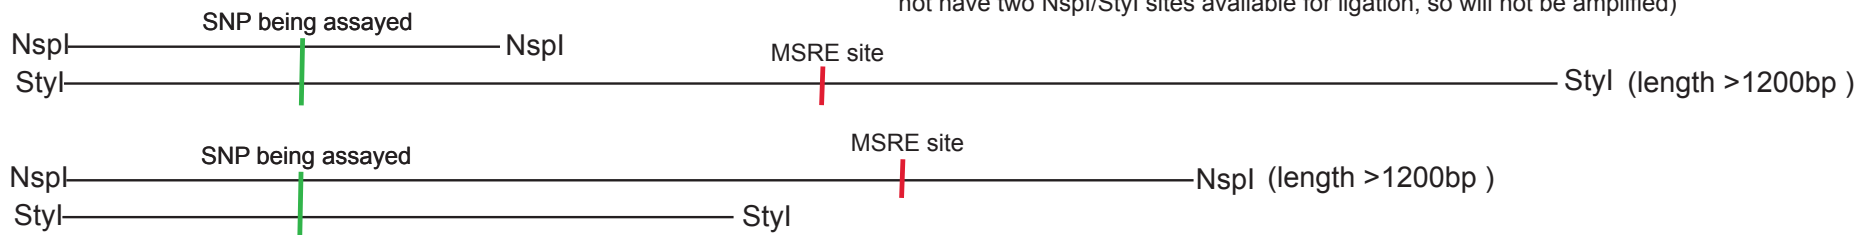

Supplement: Supplementary file [file 1]
