# Supplementary material
Source: publisher figshare collection journal article supplement (https://plos.figshare.com/articles/dataset/_/1050853)

Figure S6

A

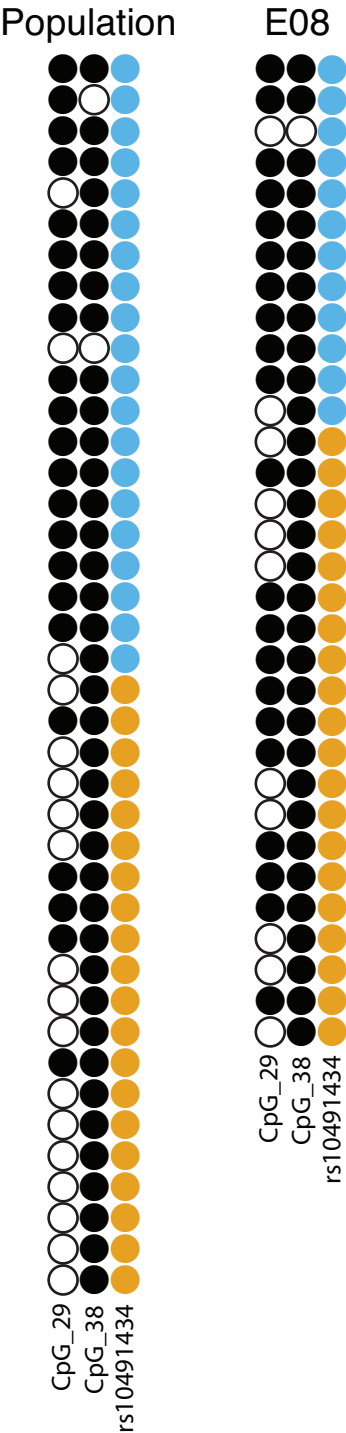

Figure S6 (continued)

B

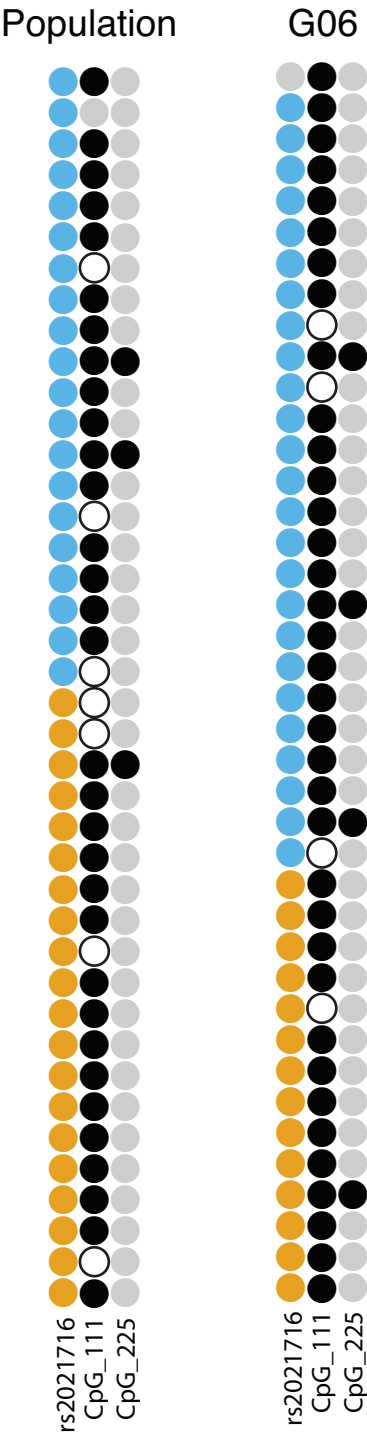

Figure S6 (continued)

C

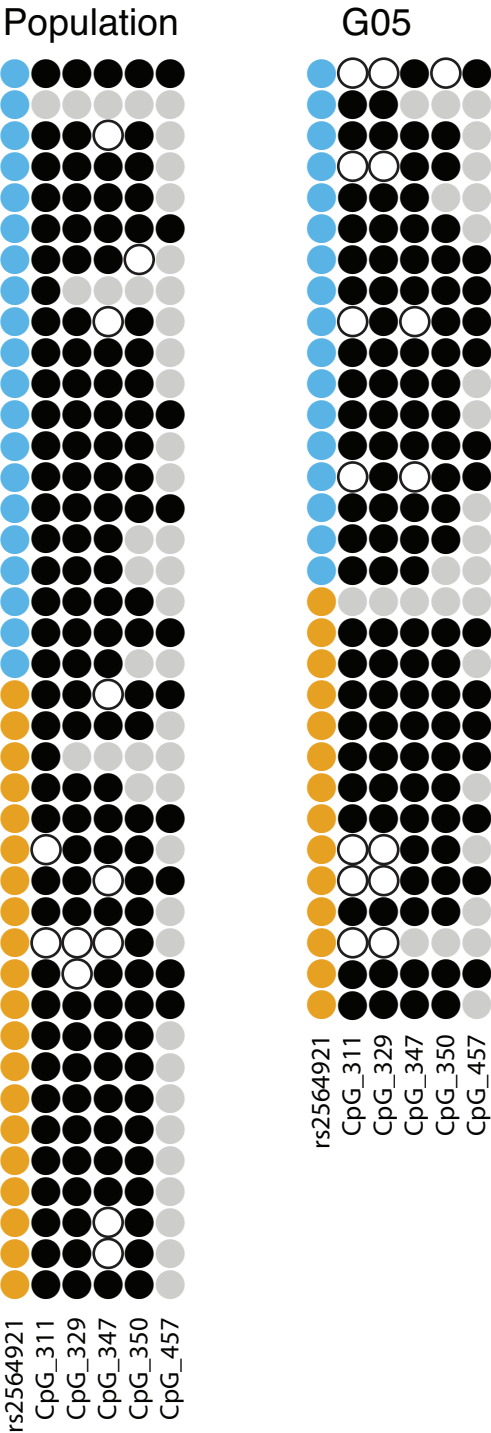

Figure S6 (continued)

D

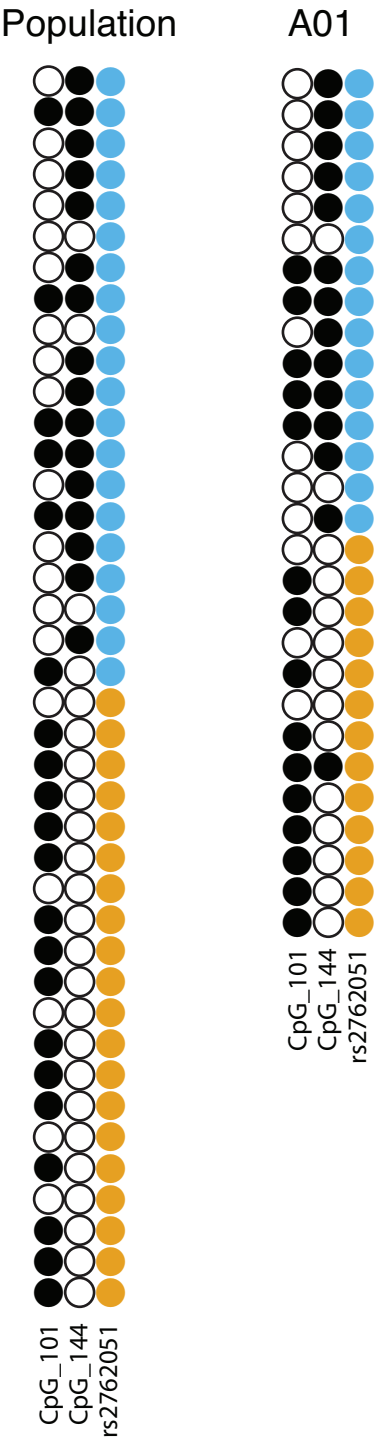

Figure S6 (continued)

E

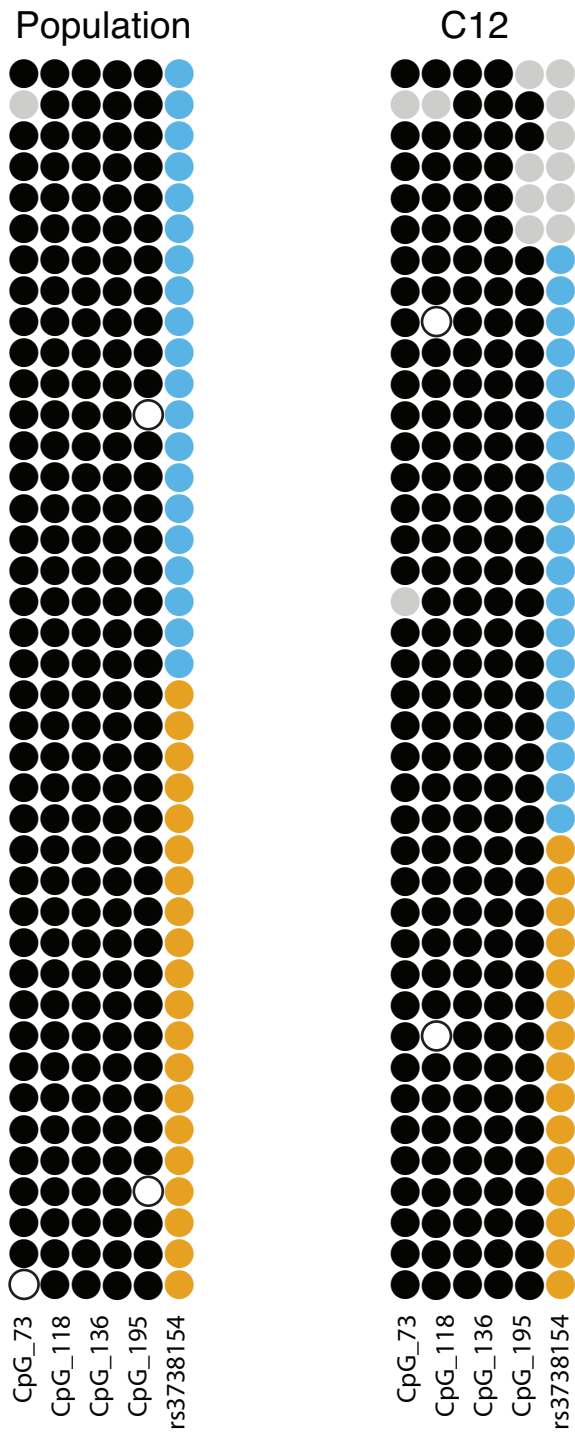

Figure S6 (continued)

F

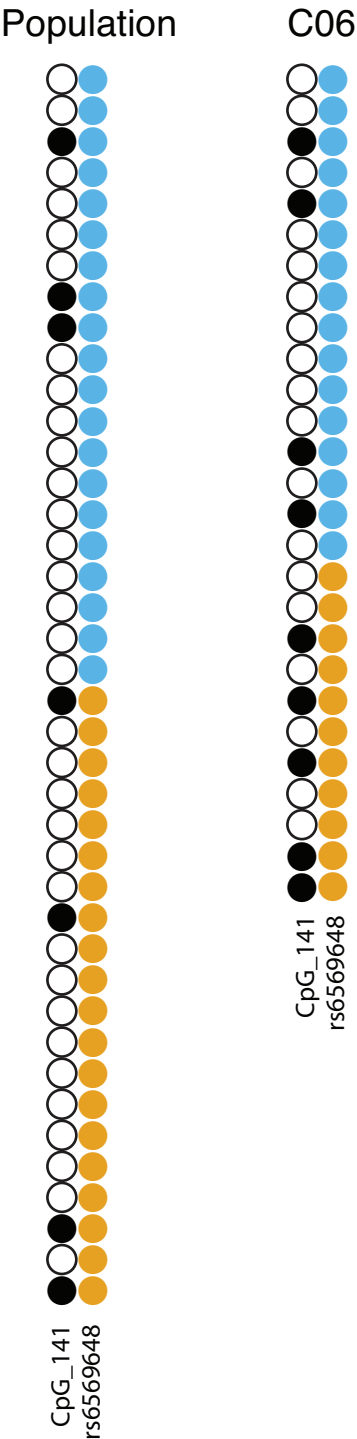

Figure S6 (continued)

G

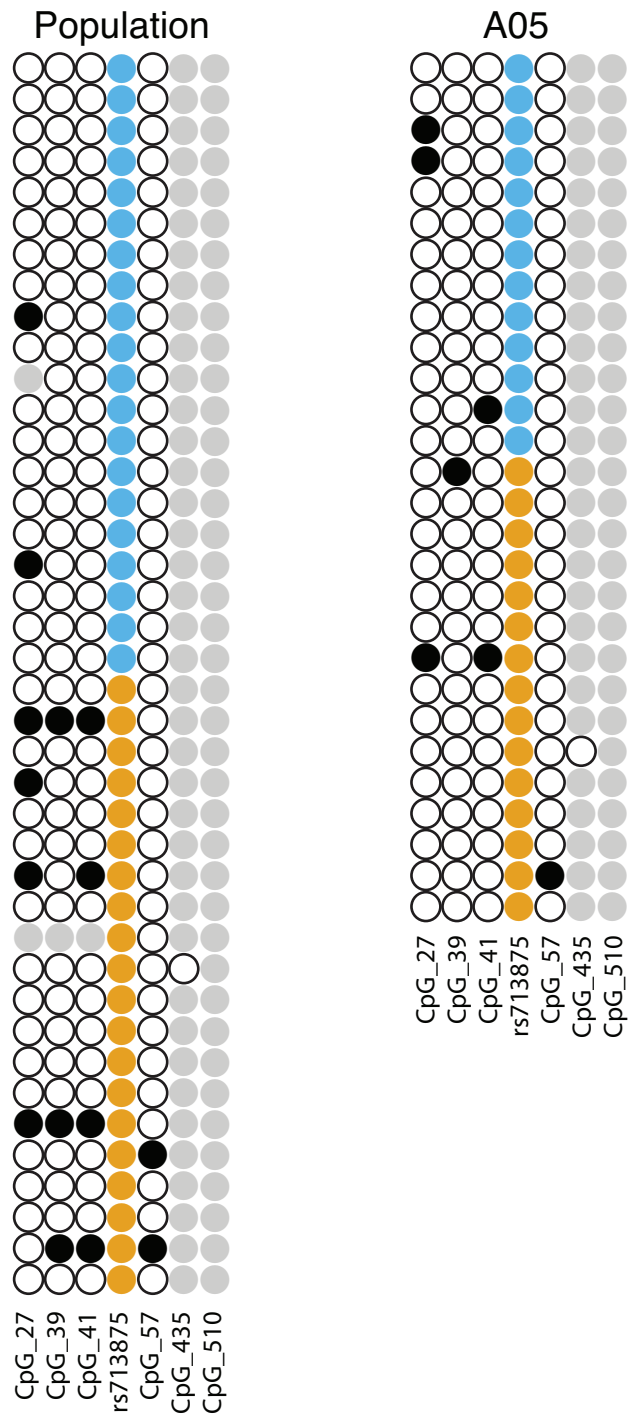

Figure S6 (continued)

H

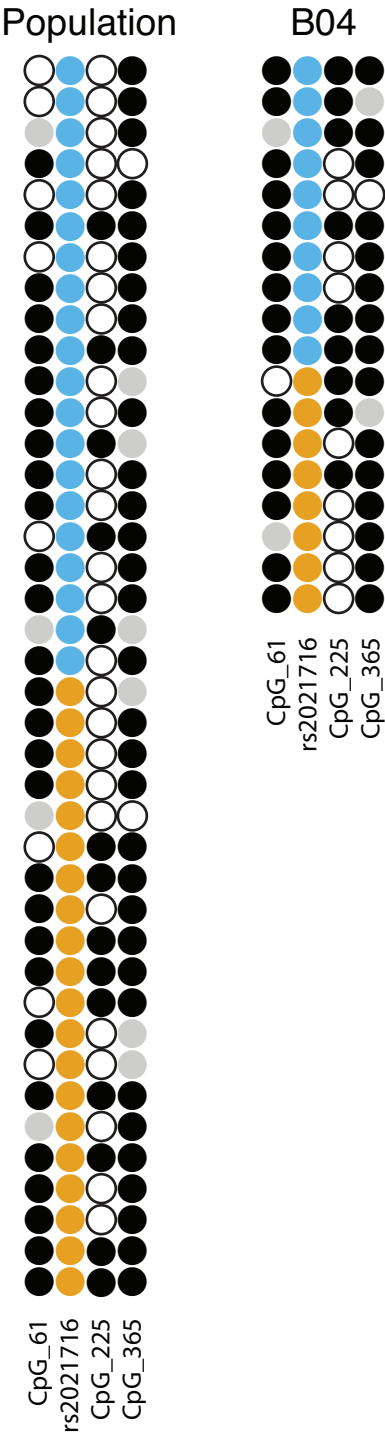



Figure S6 (continued)

I

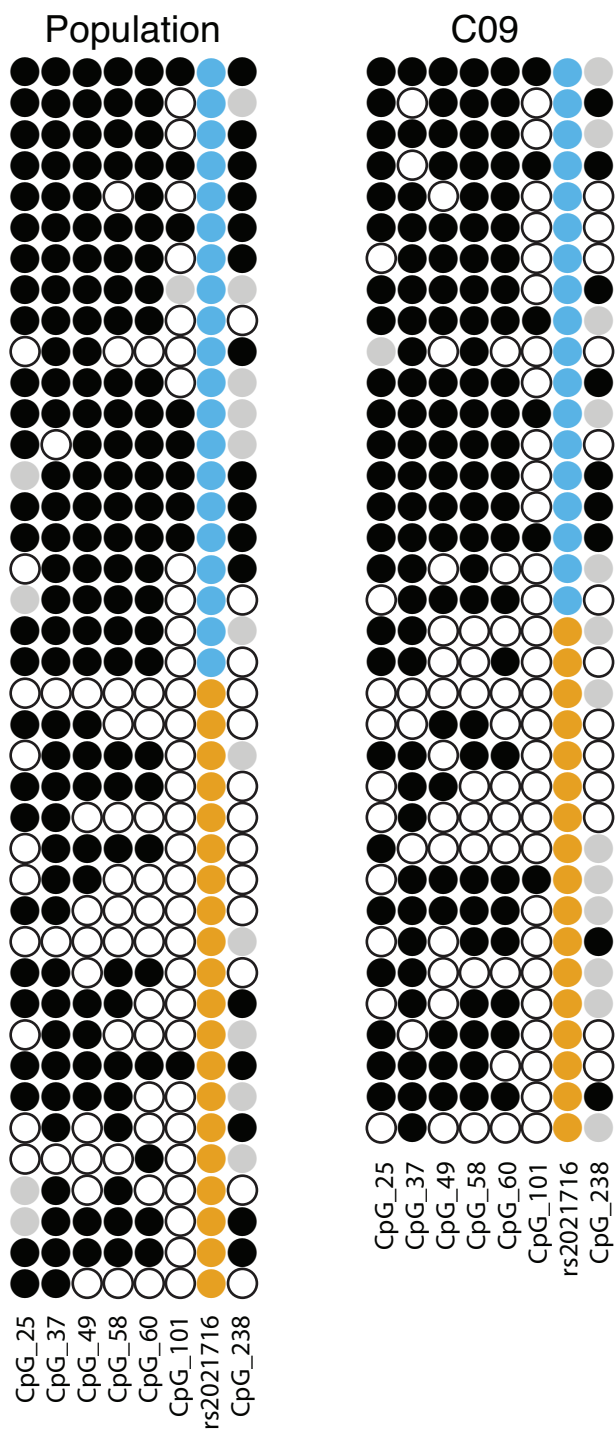

Figure S6 (continued)

J

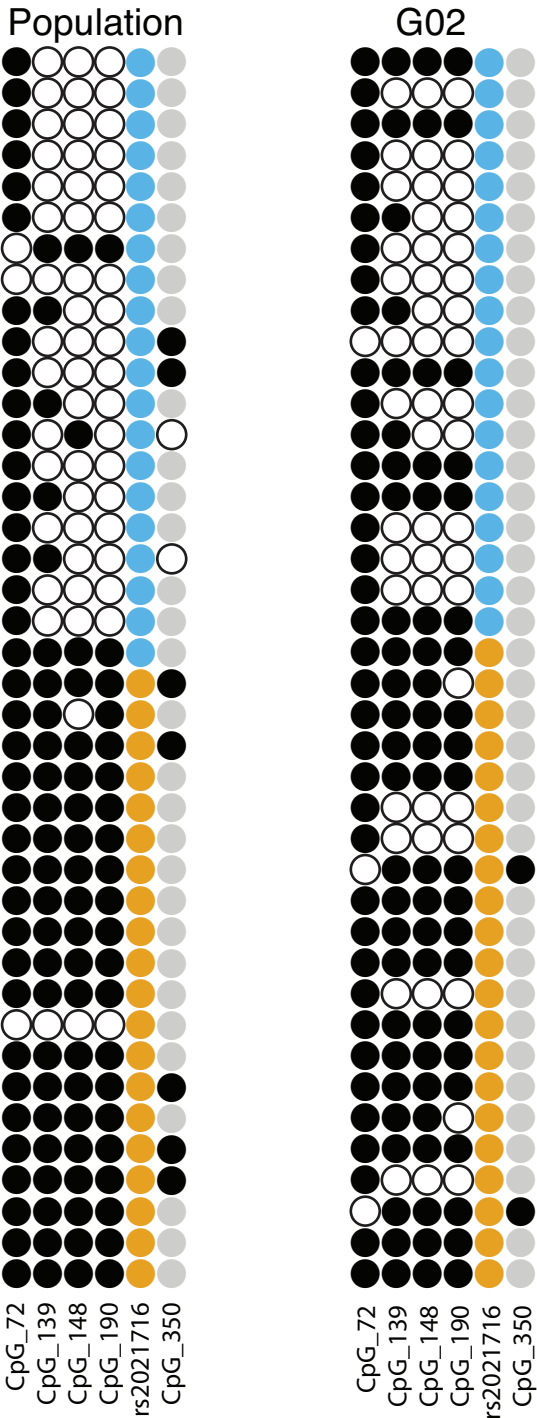

Supplement: Supplementary file [file 1]
